# Supplementary material for: Adaptive RSK‐EphA2‐GPRC5A signaling switch triggers chemotherapy resistance in ovarian cancer
Source: PubMed Central journal article supplement (PMC7136956; doi:10.15252/emmm.201911177), 2020-03-02
Supplement: EMMM-12-e11177-s001.pdf [file EMMM-12-e11177-s001.pdf]

## APPENDIX

### **Adaptive RSK-EphA2-GPRC5A signaling switch triggers chemotherapy resistance in ovarian cancer**

Lidia Moyano-Galceran, Elina A Pietilä, S Pauliina Turunen, Sara Corvigno, Elisabet Hjerpe, Daria Bulanova, Ulrika Joneborg, Twana Alkasalias, Yuichiro Miki, Masakazu Yashiro, Anastasiya Chernenko, Joonas Jukonen, Madhurendra Singh, Hanna Dahlstrand, Joseph W Carlson, Kaisa Lehti

#### **Table of Contents**

**Appendix Figure S1:** Characterization of HGSC cell lines.

**Appendix Figure S2:** Cisplatin treatment induces EphA2 (total and pS897) in patient-derived HGSC cells *ex vivo*.

**Appendix Figure S3:** *MEK-ERK1/2 pathway inhibition does not increase cell sensitivity to platinum-based treatment.*

**Appendix Figure S4:** RSKi prevents the platinum-induced EphA2-GPRC5A co-localization in OC cells.

**Appendix Figure S5:** EphA2 and GPRC5A are mutually negatively regulated in platinum-sensitive cells.

**Appendix Figure S6:** RSKi combinatorial treatment induces apoptosis in 3D co-culture.

**Appendix Figure S7:** RSKi reverts platinum-induced EphA2 phosphorylation switch in patient-derived HGSC cells but does not alter the tumor-suppressive EphA2-pY588 in normal fibroblasts.

**Appendix Table S1:** Characteristics of HGSC patients included in the TMA.

**Appendix Table S2:** Correlation analysis of maximum intensity of GPRC5A staining between primary and metastatic tumor sites.

**Appendix Table S3:** Correlation analysis between maximum intensity of GPRC5A staining and the clinico-pathological variables.

**Appendix Table S4:** Survival analysis in primary versus metastatic tumors.

**Appendix Table S5:** Univariate and multivariate analysis for the association of OS to the clinico-pathological variables and maximum intensity of GPRC5A staining.

**Appendix Table S6:** Univariate and multivariate analysis for the association of PFS to the clinico-pathological variables and maximum intensity of GPRC5A staining.

**Appendix Table S7:** Correlation of ORR and treatment sensitivity with maximum intensity of GPRC5A staining.

**Appendix Table S8:** Probe IDs from The Cancer Cell Line Encyclopedia.

**Appendix Table S9:** siRNA sequences.

**Appendix Table S10:** Exact significant p-values in figures.

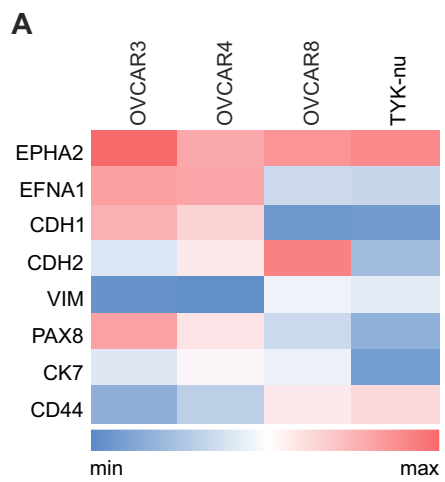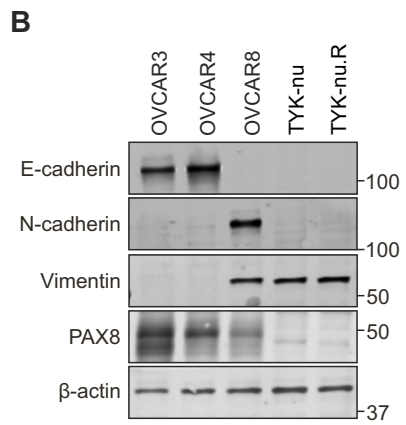

## Appendix Figure S1.

A Heat map for EphA2, ephrinA1 (EFNA1), E-cadherin (CDH1), N-cadherin (CDH2), vimentin (VIM), PAX8, cytokeratin 7 (CK7) and CD44 mRNA expression in OC cell lines. EphA2 expression was high in all cells, whereas expression of the ligand ephrinA1 was high in OVCAR3 and OVCAR4, but low in OVCAR8 and TYK-nu. Data obtained from the Cancer Cell Line Encyclopedia (<https://portals.broadinstitute.org/ccle>); no data available for TYK-nu.R. See Appendix Table S8 for probe IDs.

B E-cadherin, N-cadherin, vimentin and PAX8 protein expression in OC cell lines. High expression of E-cadherin and low vimentin in OVCAR3 and OVCAR4 defined an epithelial phenotype, whereas the opposite pattern was seen in the more mesenchymal OVCAR8, TYK-nu and TYK-nu.R, with low E-cadherin and high vimentin expression. The same  $\beta$ -actin detection for these samples is shown in Fig 2C.

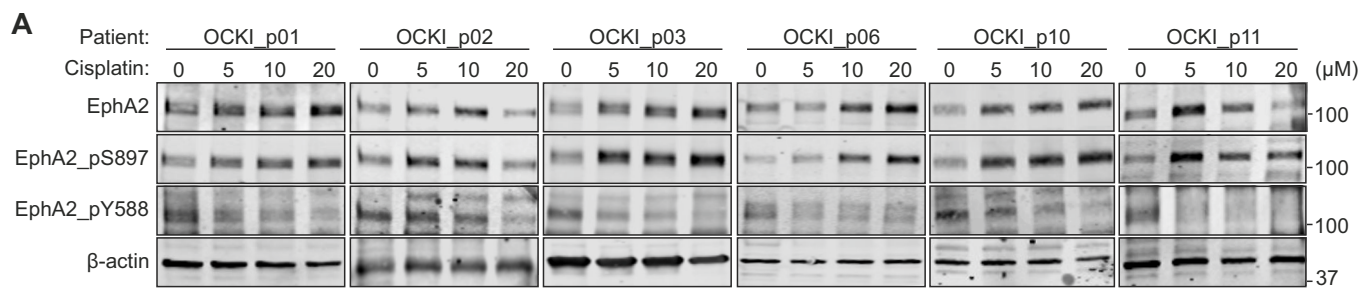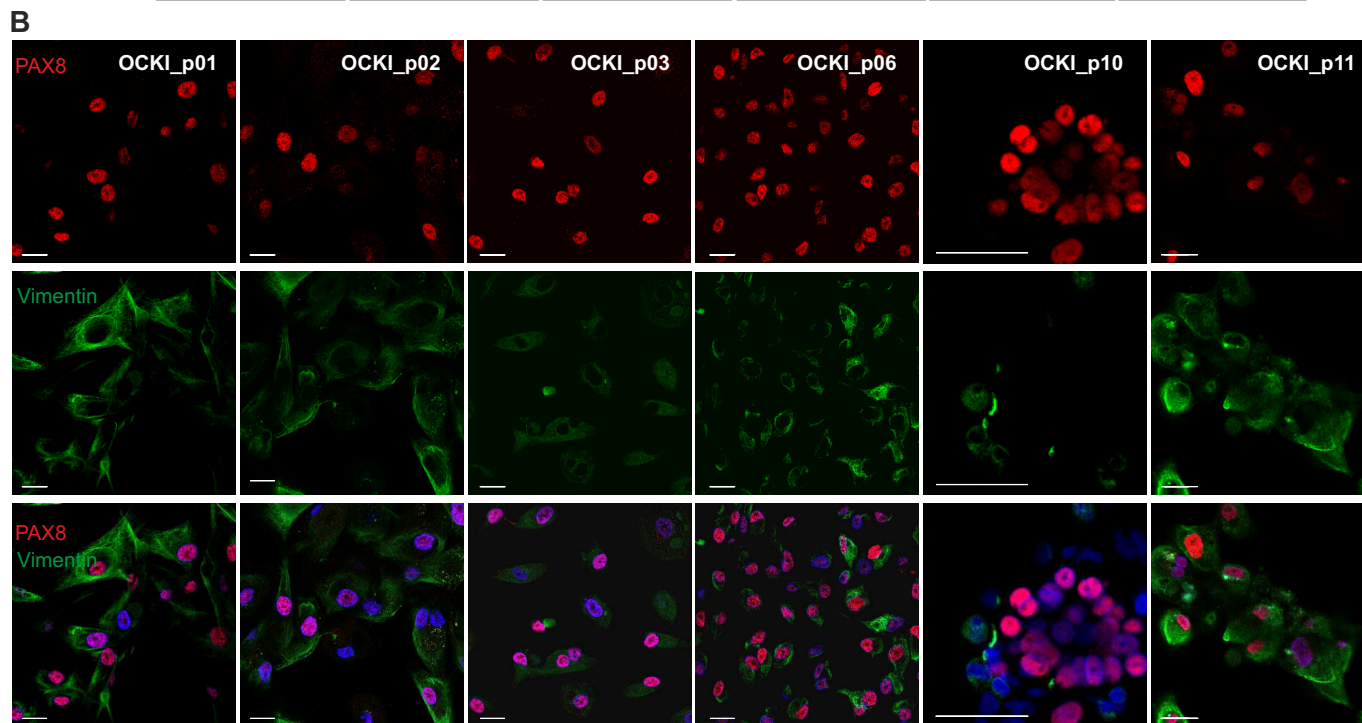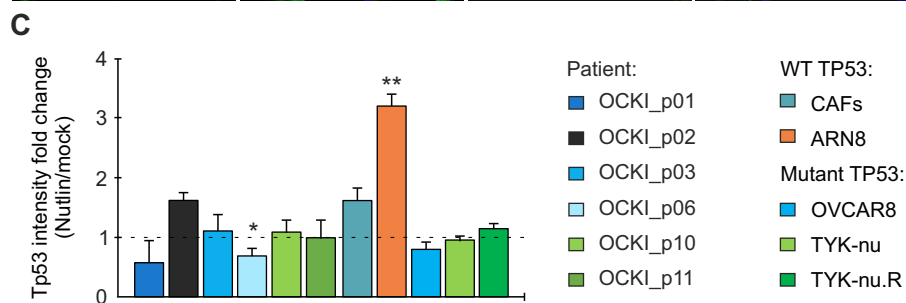

## **Appendix Figure S2.**

A EphA2 (total and phosphorylated) in patient-derived HGSC cells treated with 0-20  $\mu$ M cisplatin for 72 h were assessed by immunoblotting. EphA2 (total and pS897) were increased upon treatment coincident with decreased EphA2-pY588.

B Confocal micrographs of PAX8 (red) and vimentin (green) in patient-derived adherent cells. Scale bars: 20  $\mu$ m.

C Chart illustrates p53 fold change after nutlin treatment, quantified from confocal micrographs of p53 in patient-derived adherent cells untreated or treated with nutlin for wild-type TP53 stabilization, where mock was set to 1. Patient-derived cancer-associated fibroblasts (CAFs) and ARN8 melanoma cells (TP53 wild-type) as well as the OC cell lines OVCAR8, TYK-nu and TYK-nu.R (mutant TP53) were used as controls. p53 levels were significantly increased after treatment in ARN8 cells, whereas in patient-derived cells were not significantly increased, as seen in mutant TP53 OC cell lines. N = 3.

Data information: In (C) data are presented as mean (SD). P-values provided in Appendix Table S10, Student's t-test.

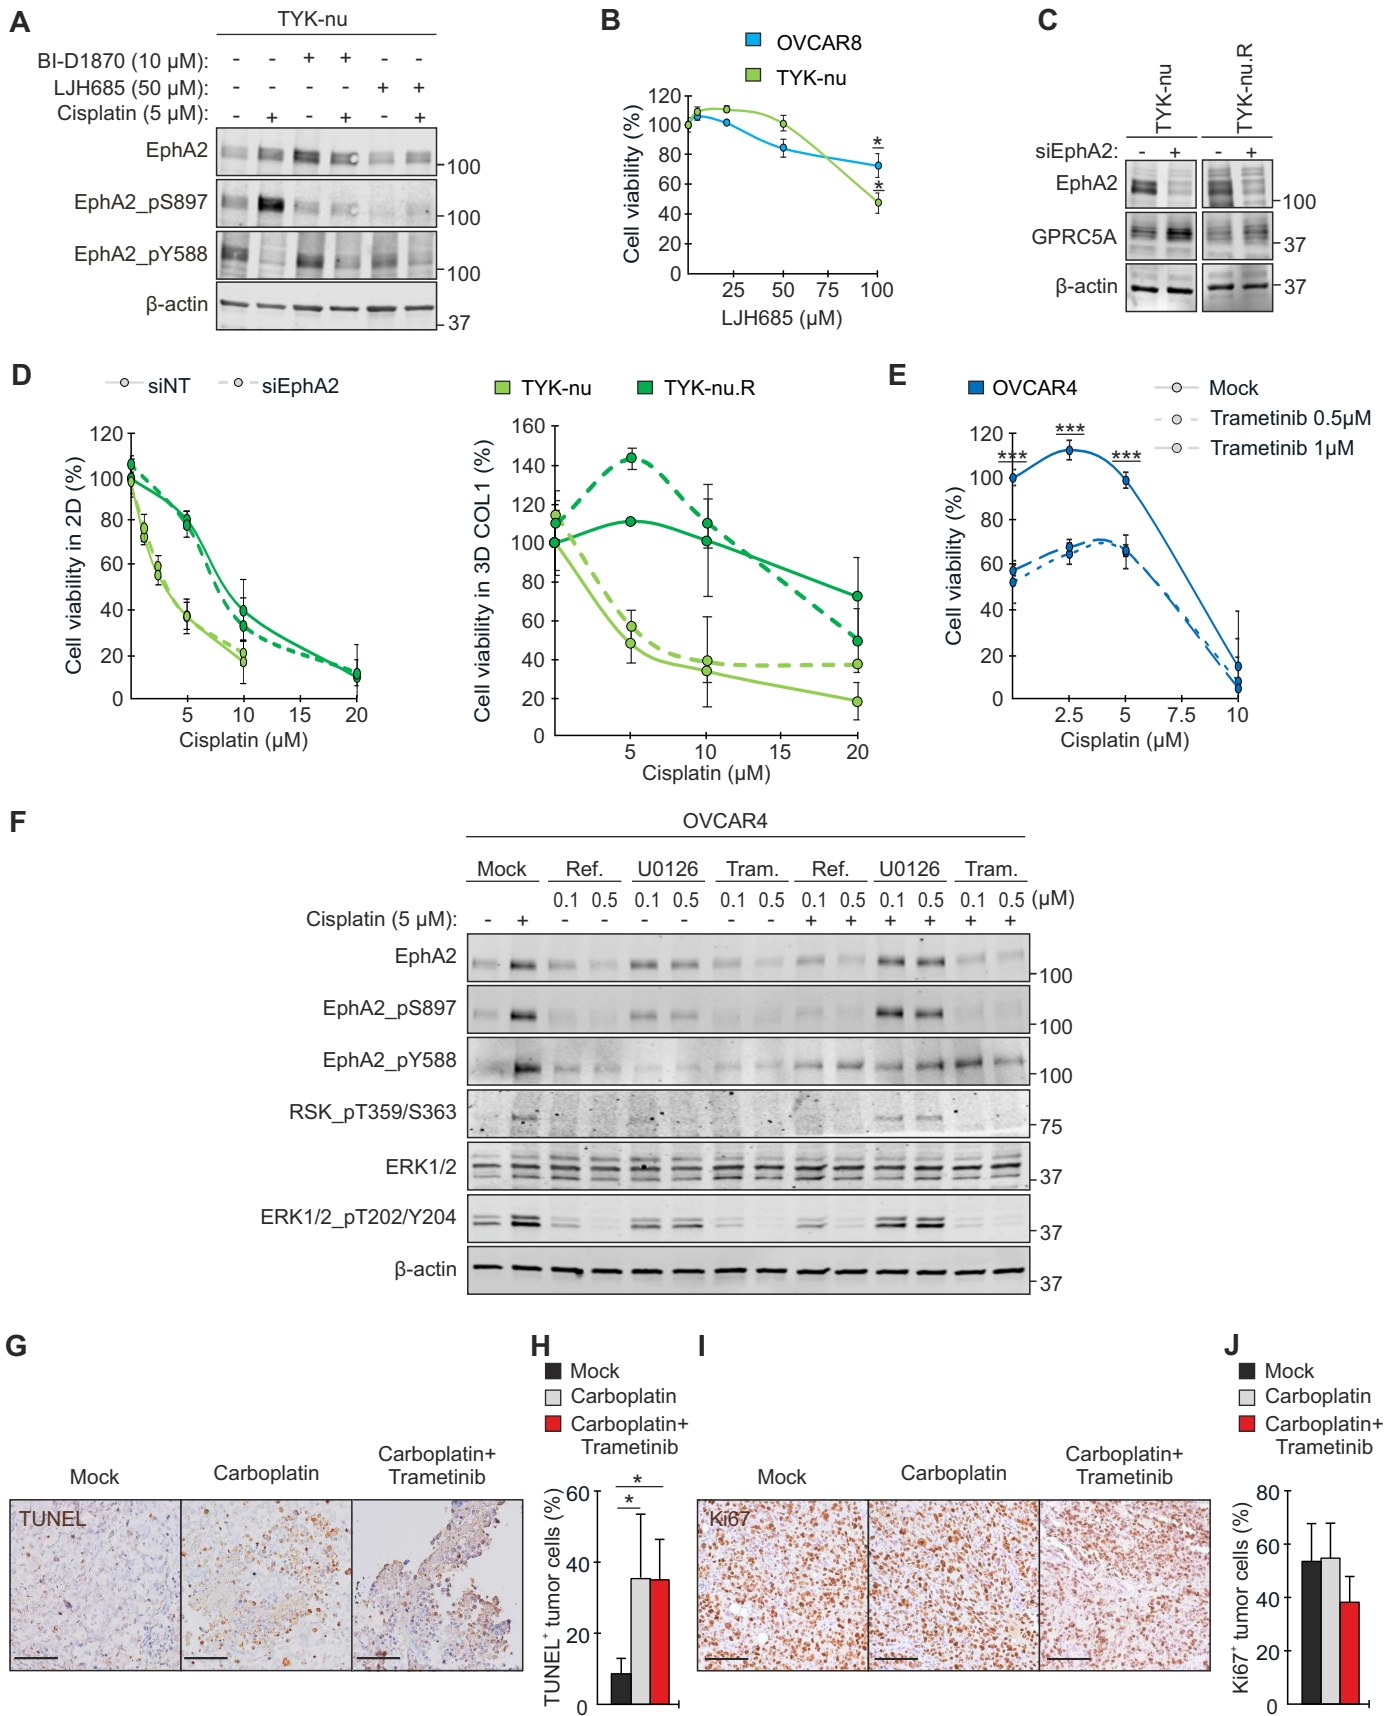

### Appendix Figure S3.

A EphA2 (total and phosphorylated) in TYK-nu treated with 0-5  $\mu$ M cisplatin with or without 10  $\mu$ M BI-D1870 or 50  $\mu$ M LJM685 for 72 h. Inhibition of the oncogenic EphA2-pS897 was achieved with both inhibitors but was greater with the more specific inhibitor LJM685.

B Cell viability of OVCAR8 and TYK-nu treated with 0-100  $\mu$ M LJM685 for 72 h. Concentrations up to 50  $\mu$ M did not significantly affect cell viability. N = 3.

C EphA2 and GPRC5A in TYK-nu and TYK-nu.R upon EphA2 depletion were assessed by immunoblotting. GPRC5A was markedly upregulated upon EphA2 depletion in TYK-nu but not in TYK-nu.R.

D Cell viability of TYK-nu and TYK-nu.R upon EphA2 depletion and 72 h treatment with 0-20  $\mu$ M cisplatin in 2D (N = 3) and 3D collagen (N = 1 experiment with 3 technical replicates). Silencing of EphA2 had no major effect on cell viability.

E Cell viability of OVCAR4 treated with cisplatin alone or in combination with 0.5-1  $\mu$ M Trametinib for 72 h. N = 3. OVCAR4 cell viability was affected by trametinib treatment alone but combinatorial trametinib-cisplatin treatment had no major effect on cisplatin treatment sensitivity.

F EphA2 (total and phosphorylated), RSK-pT359/S363, ERK1/2 (total and phosphorylated) in OVCAR4 treated with 0-5  $\mu$ M cisplatin with or without 0.1-0.5  $\mu$ M Refametinib (Ref.), U0126 or Trametinib (Tram.) for 72 h. Inhibition of the platinum-induced EphA2-pS897 was achieved with both Refametinib and Trametinib but was greatest with Trametinib, which even restored the tumor suppressive EphA2-pY588.

G-J Immunostainings and corresponding quantifications of TUNEL and Ki67 positive cell percentage in OVCAR4 mock (N = 4), carboplatin-treated (N = 4) and carboplatin+Trametinib (N = 5) treated mice. Scale bars: 100  $\mu$ m. Addition of Trametinib to carboplatin treatment further induced apoptosis. None of the treatment modalities affected cancer cell proliferation.

Data information: In (B, D, E, H and J) data are presented as mean (SD). P-values provided in Appendix Table S10, Student's t-test (B, D, E) and Mann Whitney U test (H, J).

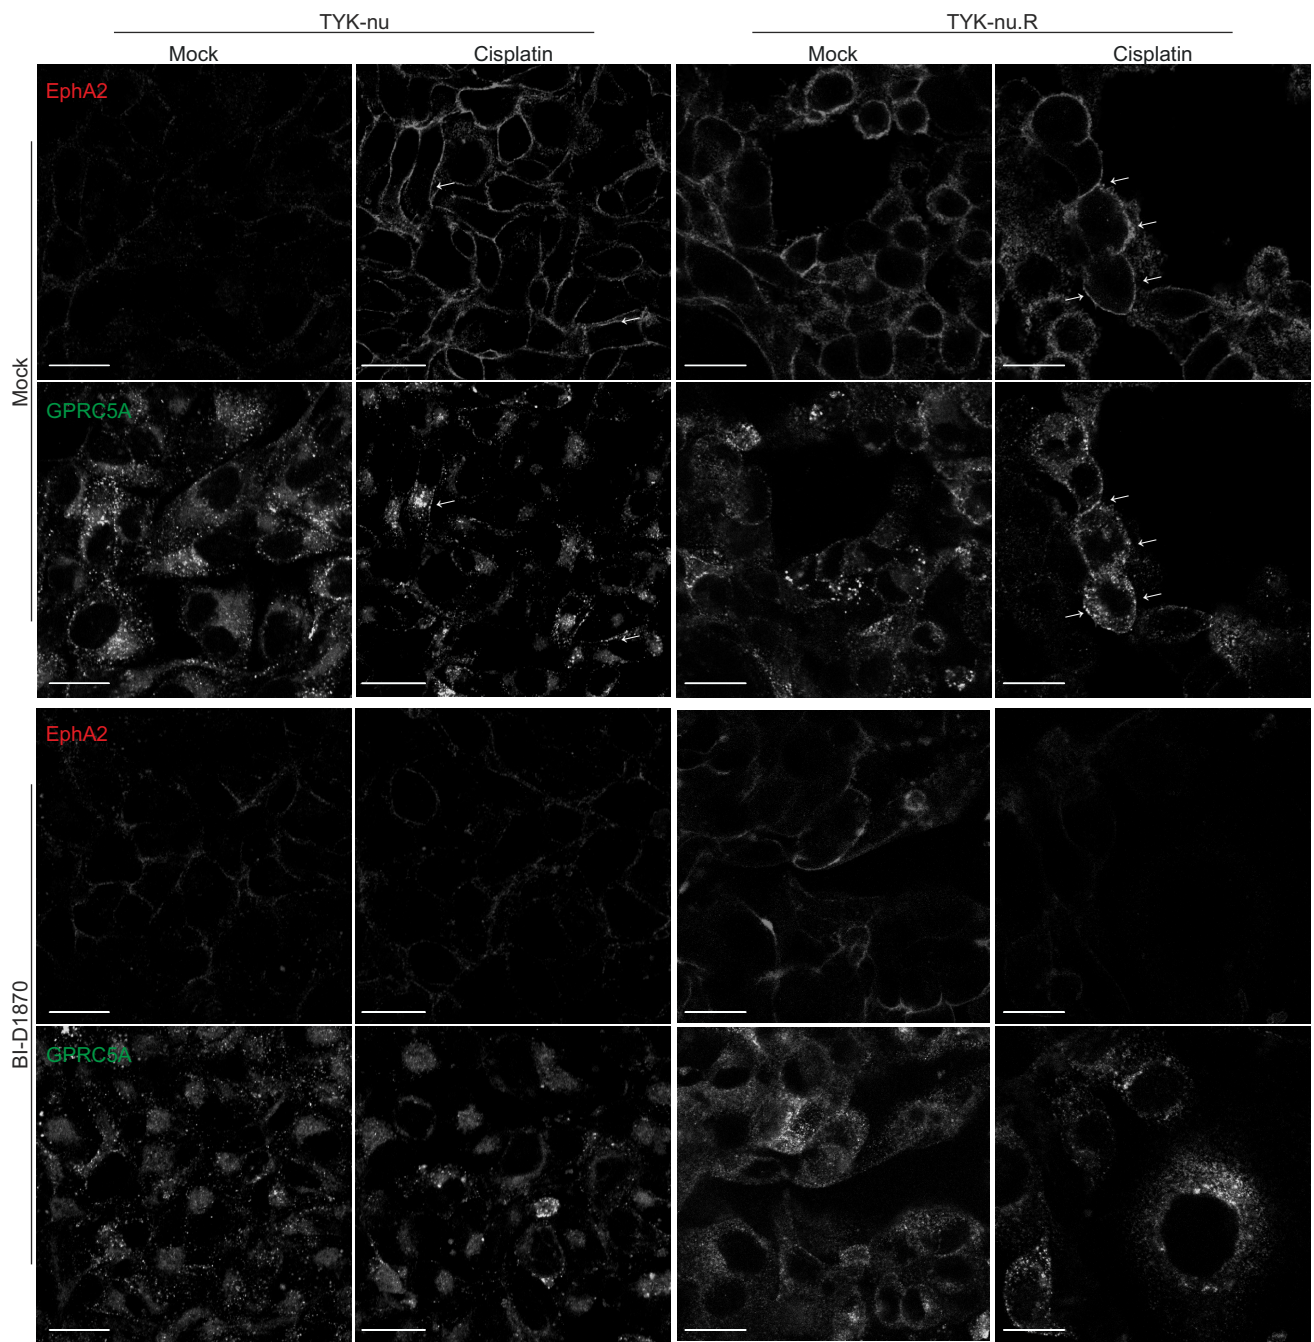



#### **Appendix Figure S4.**

Confocal micrographs of EphA2 and GPRC5A in TYK-nu and TYK-nu.R treated with 5  $\mu$ M cisplatin alone or in combination with 10  $\mu$ M BI-D1870 for 72 h. Arrows point co-localization of the receptors. Scale bars: 20  $\mu$ m.

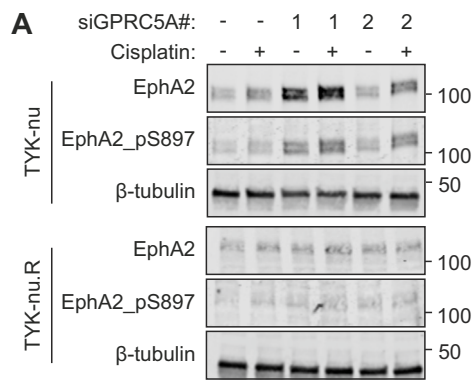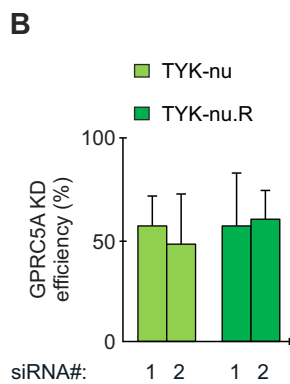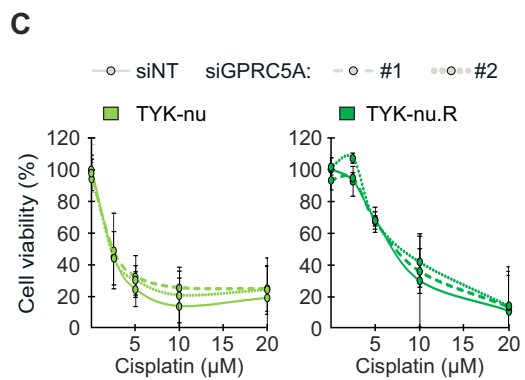

## **Appendix Figure S5.**

A EphA2 (total and pS897) in TYK-nu and TYK-nu.R upon depletion of GPRC5A were assessed by immunoblotting. Both total and EphA2-pS897 were upregulated upon silencing of GPRC5A and further upregulated upon cisplatin treatment in TYK-nu but not in TYK-nu.R.

B Chart illustrates the efficiency of siRNA-mediated GPRC5A knockdown in TYK-nu and TYK-nu.R. N = 3.

C Cell viability of TYK-nu and TYK-nu.R upon GPRC5A depletion and 72 h treatment with 0-20  $\mu$ M cisplatin. N = 3. Cell viability was not affected, potentially due to low silencing efficiency.

Data information: In (B-C) data are presented as mean (SD). Student's t-test.

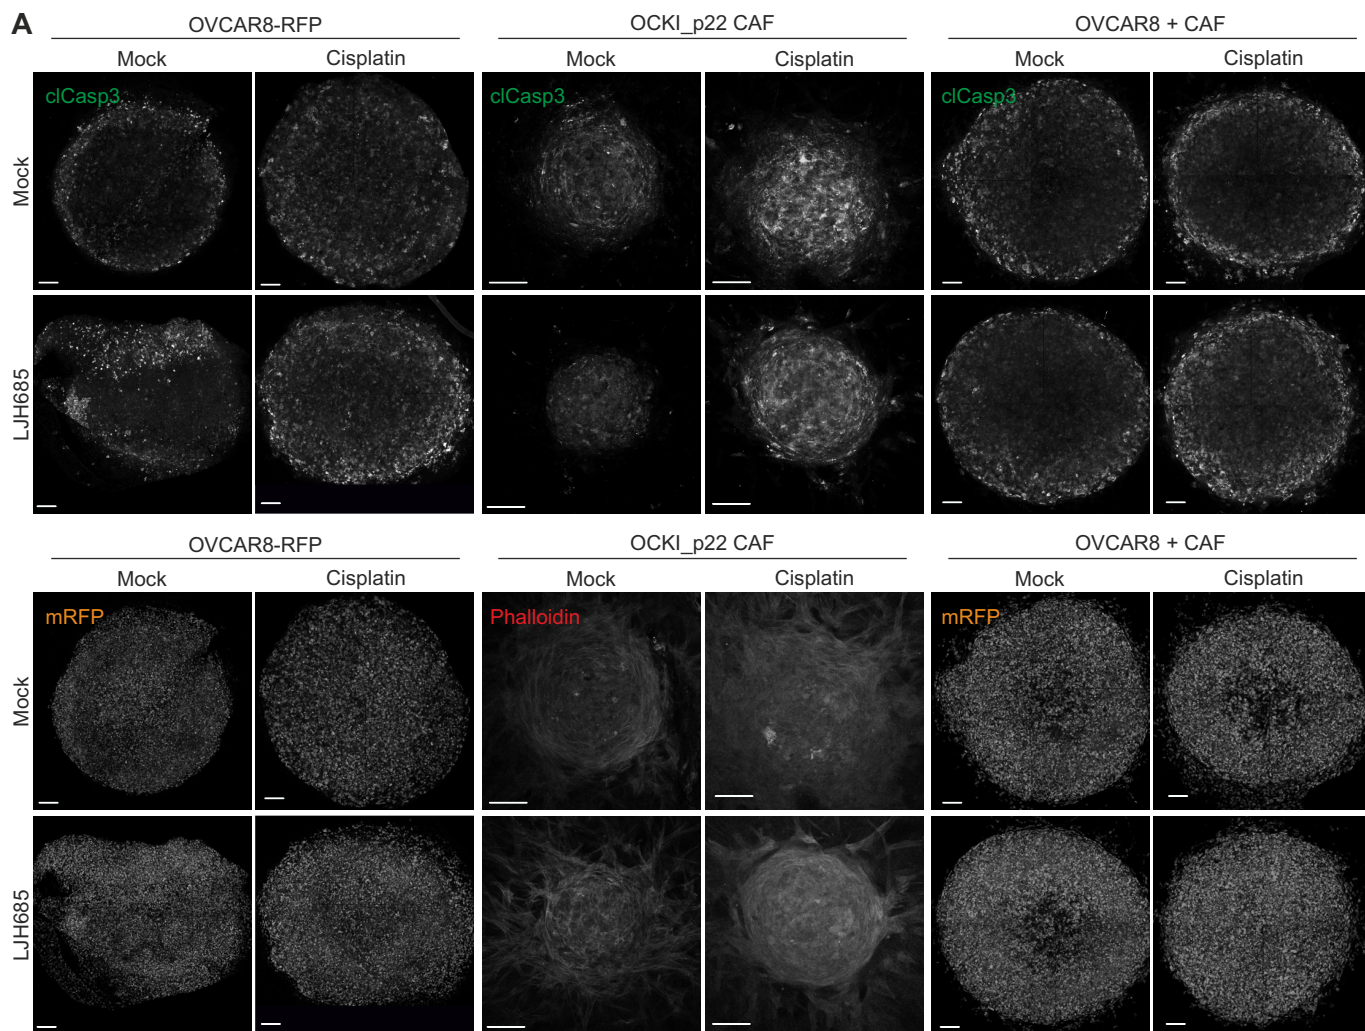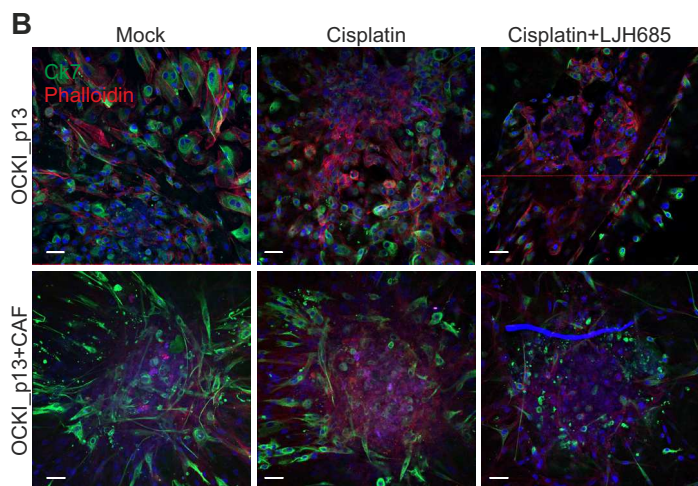

### **Appendix Figure S6.**

A Confocal micrographs of cleaved caspase-3 (clCasp3), mRFP and phalloidin in 3D OVCAR8-RFP and OCKI\_p22 CAF mono- and co-cultures treated without or with 20  $\mu$ M cisplatin or 25  $\mu$ M LJM685 alone or in combination for 20 h. Scale bars: 100  $\mu$ m.

B Confocal micrographs show cytokeratin 7 (Ck7, green) and phalloidin (red) in 3D patient OCKI\_p13 mono- and co-culture with OCKI\_p22 CAF treated without or with 20  $\mu$ M cisplatin or 25  $\mu$ M LJM685 alone or in combination for 20 h, 4 d after 3D embedding. Scale bars: 50  $\mu$ m. Red line in the micrograph for monoculture with Cisplatin+LJM685 is an artefact due to microscope acquisition, and a fiber is visible as a blue artefact in the corresponding co-culture.

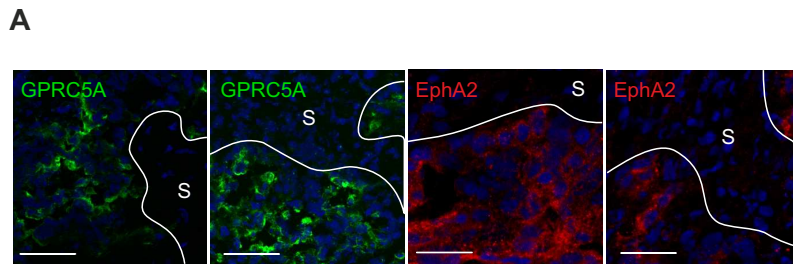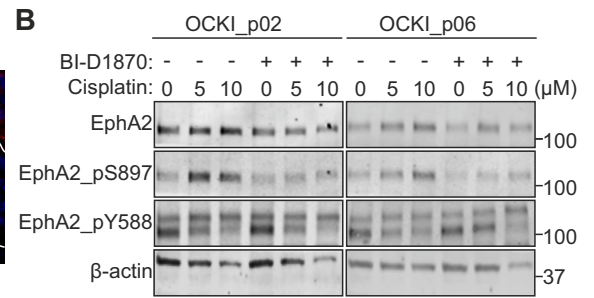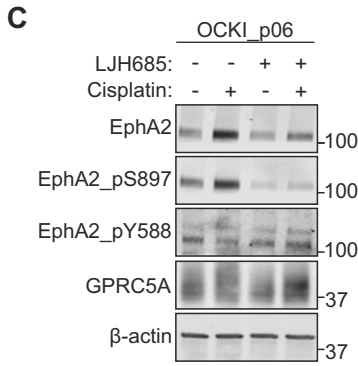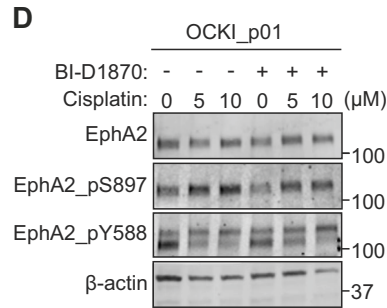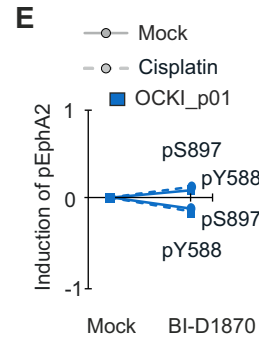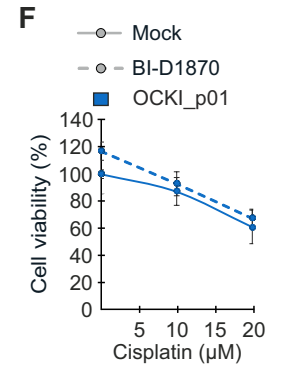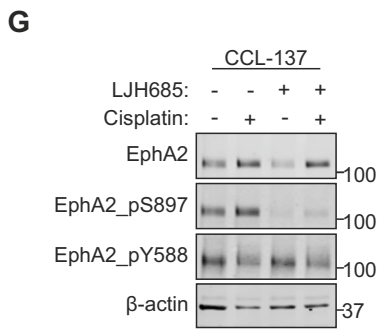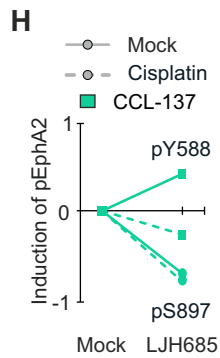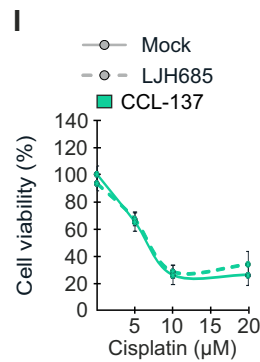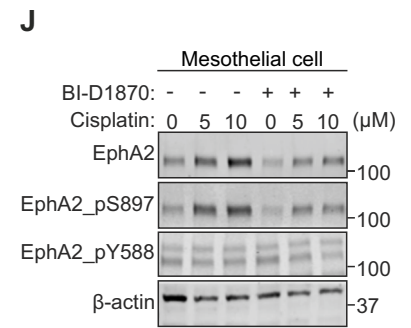

## Appendix Figure S7.

A Representative confocal micrographs show GPRC5A (green) and EphA2 (red), in frozen sections of HGSC patient tumor. S indicates the stroma. Scale bars: 50  $\mu\text{m}$ .

B EphA2 (total and phosphorylated) in OCKI1\_p02 and OCKI\_p06 cells treated with 0-10  $\mu\text{M}$  cisplatin with and without 10  $\mu\text{M}$  BI-D1870 for 72 h. RSK-EphA2-pS897 inhibition was coupled with EphA2-pY588 upregulation.

C EphA2 (total and phosphorylated) in the GPRC5A<sup>high</sup> OCKI\_p06 HGS cells treated without or with 0-20  $\mu\text{M}$  cisplatin and 0-50  $\mu\text{M}$  LJH685 for 72 h.

D, E EphA2 (D; total and phosphorylated) and corresponding pS897/Y588 ratio (E) in the GPRC5A<sup>low</sup> OCKI\_p01 cells treated with 0-10  $\mu\text{M}$  cisplatin with or without 10  $\mu\text{M}$  BI-D1870 for 72 h. Cisplatin did not prevent EphA2-pS897 and rather decreased EphA2-pY588.

F Cell viability of OCKI\_p01 cells treated with 0-20  $\mu\text{M}$  cisplatin with and without 10  $\mu\text{M}$  BI-D1870 for 72 h. Cell viability in these patient-derived HGSC cells with lower GPRC5A was not affected by RSKi. N = 4.

G, H EphA2 (G; total and phosphorylated) and corresponding pS897/Y588 ratio (H) in CCL-137 normal fibroblasts treated with 0-5  $\mu\text{M}$  cisplatin with and without 25  $\mu\text{M}$  LJH685 for 72 h. Upon cisplatin treatment, RSK inhibition did not restore the tumor-suppressive EphA2-pY588.

I Cell viability of CCL-137 normal fibroblasts treated with 0-20  $\mu\text{M}$  cisplatin with and without 25  $\mu\text{M}$  LJH685 for 72 h. Cell viability in these cells was not affected by RSKi. N = 3.

J EphA2 expression and phosphorylation in mesothelial cells treated with 0-10  $\mu\text{M}$  cisplatin and with or without 10  $\mu\text{M}$  BI-D1870 for 72 h.

Data information: In (F, I) are presented as mean (SD). P-values provided in Appendix Table S10, Student's t-test.

**Appendix Table S1.** Characteristics of HGSC patients included in the TMA.

| Characteristic                        | Patients<br>(N = 126) |
|---------------------------------------|-----------------------|
| Median age, years (range)             | 64 (36-84)            |
| FIGO stage                            |                       |
| I                                     | 0 (0%)                |
| II                                    | 2 (1.6%)              |
| III                                   | 99 (78.6%)            |
| IV                                    | 25 (19.8%)            |
| Type of surgery                       |                       |
| Primary                               | 98 (77.8%)            |
| Delayed primary or interval           | 18 (14.3%)            |
| No surgery                            | 10 (7.9%)             |
| Residual tumor after surgery          |                       |
| No residual tumor                     | 33 (26.2%)            |
| Residual tumor after surgery          | 83 (65.9%)            |
| Unknown                               | 10 (7.9%)             |
| First line of chemotherapy            |                       |
| Platinum (alone or + taxane)          | 116 (92.1%)           |
| Non-platinum chemotherapy             | 1 (0.8%)              |
| No chemotherapy                       | 8 (6.3%)              |
| Unknown                               | 1 (0.8%)              |
| Treatment response                    |                       |
| CR                                    | 70 (55.6%)            |
| PR                                    | 26 (20.6%)            |
| SD                                    | 3 (2.4%)              |
| PD                                    | 15 (11.9%)            |
| Unknown                               | 12 (9.5%)             |
| Median follow up time, months (range) | 36 (1-166)            |
| Survival                              |                       |
| Alive                                 | 16 (12.7%)            |
| Dead                                  | 110 (87.3%)           |

**Appendix Table S2.** Correlation analysis of maximum intensity of GPRC5A staining between primary and metastatic tumor sites. P value was derived from gamma test.

|       |            | Staining |         |      |         |       |        | P value |
|-------|------------|----------|---------|------|---------|-------|--------|---------|
|       |            | Low      |         | High |         | Total |        |         |
| Type  | Primary    | 68       | (50.4%) | 31   | (49.2%) | 99    | (50%)  | 0.897   |
|       | Metastasis | 67       | (49.6%) | 32   | (50.8%) | 99    | (50%)  |         |
| Total |            | 135      | (100%)  | 63   | (100%)  | 198   | (100%) |         |



**Appendix Table S3.** Correlation analysis between maximum intensity of GPRC5A staining and the clinico-pathological variables. P values were derived from gamma test.

| Clinico-pathological variables          | Primary  |       |      |       | P value      | Metastatic |       |      |       | P value |
|-----------------------------------------|----------|-------|------|-------|--------------|------------|-------|------|-------|---------|
|                                         | Staining |       |      |       |              | Staining   |       |      |       |         |
|                                         | Low      |       | High |       |              | Low        |       | High |       |         |
| Age at diagnosis (median cutoff, years) |          |       |      |       | 0.507        |            |       |      |       | 0.146   |
| ≤64                                     | 39       | 52.7% | 18   | 46.2% |              | 33         | 45.8% | 24   | 60%   |         |
| >64                                     | 35       | 47.3% | 21   | 53.8% |              | 39         | 54.2% | 16   | 40%   |         |
| Type of surgery                         |          |       |      |       | 0.899        |            |       |      |       | 0.191   |
| Primary                                 | 60       | 81.1% | 32   | 82.1% |              | 60         | 83.3% | 29   | 72.5% |         |
| Delayed primary or interval             | 10       | 13.5% | 5    | 12.8% |              | 8          | 11.1% | 7    | 17.5% |         |
| No surgery                              | 4        | 5.4%  | 2    | 5.1%  |              |            |       |      |       |         |
| Residual tumor after surgery            |          |       |      |       | 0.745        |            |       |      |       | 0.860   |
| No residual tumor                       | 21       | 30%   | 10   | 27%   |              | 20         | 29.4% | 10   | 27.8% |         |
| Residual tumor                          | 49       | 70%   | 27   | 73%   |              | 48         | 70.6% | 26   | 72.2% |         |
| FIGO stage                              |          |       |      |       | <b>0.006</b> |            |       |      |       | 0.482   |
| IIC-IIIB                                | 7        | 9.5%  | 0    | 0%    |              | 6          | 8.3%  | 2    | 5%    |         |
| IIIC-IV                                 | 67       | 90.5% | 39   | 100%  |              | 66         | 91.7% | 38   | 85%   |         |

**Appendix Table S4.** Survival analysis in primary versus metastatic tumors. P values were derived from Log Rank test.

| <b>OS primary</b>     |         |            |                   |           |              |
|-----------------------|---------|------------|-------------------|-----------|--------------|
| GPRC5A intensity      | Total N | Censored N | Mean OS (months)  | Std Error | P value      |
| Low                   | 74      | 12         | 56.187            | 5.40      | <b>0.044</b> |
| High                  | 39      | 3          | 39.236            | 5.43      |              |
| <b>OS metastatic</b>  |         |            |                   |           |              |
| GPRC5A intensity      | Total N | Censored N | Mean OS (months)  | Std Error | P value      |
| Low                   | 72      | 12         | 59.576            | 6.02      | <b>0.012</b> |
| High                  | 40      | 3          | 36.875            | 5.41      |              |
| <b>PFS primary</b>    |         |            |                   |           |              |
| GPRC5A intensity      | Total N | Censored N | Mean PFS (months) | Std Error | P value      |
| Low                   | 66      | 7          | 35.248            | 5.84      | 0.067        |
| High                  | 35      | 0          | 18.314            | 1.74      |              |
| <b>PFS metastatic</b> |         |            |                   |           |              |
| GPRC5A intensity      | Total N | Censored N | Mean PFS (months) | Std Error | P value      |
| Low                   | 64      | 7          | 34.877            | 5.69      | <b>0.009</b> |
| High                  | 36      | 1          | 19.833            | 4.00      |              |

**Appendix Table S5.** Univariate and multivariate analysis for the association of OS to the clinico-pathological variables and maximum intensity of GPRC5A staining. P values were derived from Cox regression.

| OS Primary                              | Univariate |                   |              | Multivariate |                  |              |
|-----------------------------------------|------------|-------------------|--------------|--------------|------------------|--------------|
|                                         | N          | HR (95% CI)       | P value      | N            | HR (95% CI)      | P value      |
| Age at diagnosis (median cutoff, years) | 113        |                   |              | 107          |                  |              |
| ≤64                                     | 57         | 1 (reference)     | <b>0.002</b> | 55           | 1 (reference)    | <b>0.002</b> |
| >64                                     | 56         | 1.88 (1.26-2.80)  |              | 52           | 2.03 (1.30-3.15) |              |
| Type of surgery                         | 113        |                   |              | 107          |                  |              |
| Primary                                 | 92         | 1 (reference)     |              | 92           | 1 (reference)    |              |
| Delayed primary or interval             | 15         | 1.09 (0.61-1.97)  | 0.772        | 15           | 1.81 (0.94-3.51) | 0.078        |
| No surgery                              | 6          | 3.75 (1.59-8.84)  | <b>0.003</b> | 0            | -                | -            |
| Residual tumor after surgery            | 107        |                   |              | 107          |                  |              |
| No residual tumor                       | 31         | 1 (reference)     | <b>0.003</b> | 31           | 1 (reference)    | <b>0.013</b> |
| Residual tumor                          | 76         | 2.10 (1.29-3.40)  |              | 76           | 2.09 (1.17-3.74) |              |
| FIGO stage                              | 113        |                   |              | 107          |                  |              |
| IIC-IIIB                                | 7          | 1 (reference)     | 0.122        | 7            | 1 (reference)    | 0.626        |
| IIIC-IV                                 | 106        | 2.04 (0.83-5.02)  |              | 100          | 1.3 (0.45-3.73)  |              |
| GPRC5A staining                         | 113        |                   |              | 107          |                  |              |
| Low                                     | 74         | 1 (reference)     | <b>0.047</b> | 70           | 1 (reference)    | <b>0.032</b> |
| High                                    | 39         | 1.52 (1.01-2.30)  |              | 37           | 1.62 (1.04-2.52) |              |
| <b>OS Metastatic</b>                    |            |                   |              |              |                  |              |
| OS Metastatic                           | Univariate |                   |              | Multivariate |                  |              |
|                                         | N          | HR (95% CI)       | P value      | N            | HR (95% CI)      | P value      |
| Age at diagnosis (median cutoff, years) | 112        |                   |              | 104          |                  |              |
| ≤64                                     | 57         | 1 (reference)     | <b>0.004</b> | 53           | 1 (reference)    | <b>0.000</b> |
| >64                                     | 55         | 1.82 (1.22-2.71)  |              | 51           | 2.37 (1.48-3.78) |              |
| Type of surgery                         | 112        |                   |              | 104          |                  |              |
| Primary                                 | 89         | 1 (reference)     |              | 89           | 1 (reference)    |              |
| Delayed primary or interval             | 15         | 1.06 (0.59-1.91)  | 0.846        | 15           | 1.42 (0.76-2.66) | 0.275        |
| No surgery                              | 8          | 4.94 (2.29-10.66) | <b>0.000</b> | -            | -                | -            |
| Residual tumor after surgery            | 104        |                   |              | 104          |                  |              |
| No residual tumor                       | 30         | 1 (reference)     | <b>0.002</b> | 30           | 1 (reference)    | <b>0.029</b> |
| Residual tumor                          | 74         | 2.16 (1.33-3.52)  |              | 74           | 1.93 (1.07-3.47) |              |
| FIGO stage                              | 112        |                   |              | 104          |                  |              |
| IIC-IIIB                                | 8          | 1 (reference)     | 0.128        | 8            | 1 (reference)    | 0.312        |
| IIIC-IV                                 | 104        | 0.526 (0.23-1.20) |              | 96           | 1.68 (0.61-4.59) |              |
| GPRC5A staining                         | 112        |                   |              | 104          |                  |              |
| Low                                     | 72         | 1 (reference)     | <b>0.013</b> | 68           | 1 (reference)    | <b>0.002</b> |
| High                                    | 40         | 1.69 (1.12-2.57)  |              | 36           | 2.12 (1.33-3.37) |              |

**Appendix Table S6.** Univariate and multivariate analysis for the association of PFS to the clinico-pathological variables and maximum intensity of GPRC5A staining. P values were derived from Cox regression.

| PFS Primary                             | Univariate |                  |              | Multivariate |                  |              |
|-----------------------------------------|------------|------------------|--------------|--------------|------------------|--------------|
|                                         | N          | HR (95% CI)      | P value      | N            | HR (95% CI)      | P value      |
| Age at diagnosis (median cutoff, years) | 101        |                  |              | 97           |                  |              |
| ≤64                                     | 53         | 1 (reference)    | 0.630        | 51           | 1 (reference)    | 0.719        |
| >64                                     | 48         | 1.11 (0.74-1.66) |              | 46           | 1.09 (0.69-1.72) |              |
| Type of surgery                         | 101        |                  |              | 97           |                  |              |
| Primary                                 | 82         | 1 (reference)    |              | 82           | 1 (reference)    |              |
| Delayed primary or interval             | 15         | 0.97 (0.54-1.76) | 0.931        | 15           | 1.20 (0.61-2.34) | 0.598        |
| No surgery                              | 4          | 1.31 (0.47-3.59) | 0.606        | -            | -                | -            |
| Residual tumor after surgery            | 97         |                  |              | 97           |                  |              |
| No residual tumor                       | 30         | 1 (reference)    | <b>0.018</b> | 30           | 1 (reference)    | 0.092        |
| Residual tumor                          | 67         | 1.76 (1.10-2.80) |              | 67           | 1.63 (0.92-2.88) |              |
| FIGO stage                              | 101        |                  |              | 97           |                  |              |
| IIC-IIIB                                | 6          | 1 (reference)    | 0.060        | 6            | 1 (reference)    | 0.380        |
| IIIC-IV                                 | 95         | 2.64 (0.96-7.23) |              | 91           | 1.70 (0.52-5.52) |              |
| GPRC5A staining                         | 101        |                  |              | 97           |                  |              |
| Low                                     | 66         | 1 (reference)    | 0.077        | 64           | 1 (reference)    | 0.143        |
| High                                    | 35         | 1.47 (0.96-2.26) |              | 33           | 1.40 (0.89-2.19) |              |
| <b>PFS Metastatic</b>                   |            |                  |              |              |                  |              |
|                                         |            | Univariate       |              |              | Multivariate     |              |
|                                         | N          | HR (95% CI)      | P value      | N            | HR (95% CI)      | P value      |
| Age at diagnosis (median cutoff, years) | 100        |                  |              | 94           |                  |              |
| ≤64                                     | 53         | 1 (reference)    | 0.559        | 49           | 1 (reference)    | 0.207        |
| >64                                     | 47         | 1.13 (0.75-1.70) |              | 45           | 1.35 (0.85-2.15) |              |
| Type of surgery                         | 100        |                  |              | 94           |                  |              |
| Primary                                 | 79         | 1 (reference)    |              | 79           | 1 (reference)    |              |
| Delayed primary or interval             | 15         | 0.96 (0.52-1.77) | 0.889        | 15           | 1.18 (0.60-2.30) | 0.638        |
| No surgery                              | 6          | 2.10 (0.90-4.89) | 0.084        | -            | -                | -            |
| Residual tumor after surgery            | 94         |                  |              | 94           |                  |              |
| No residual tumor                       | 29         | 1 (reference)    | <b>0.010</b> | 29           | 1 (reference)    | 0.131        |
| Residual tumor                          | 65         | 1.80 (1.16-3.05) |              | 65           | 1.57 (0.87-2.81) |              |
| FIGO stage                              | 100        |                  |              | 94           |                  |              |
| IIC-IIIB                                | 7          | 1 (reference)    | 0.055        | 7            | 1 (reference)    | 0.237        |
| IIIC-IV                                 | 93         | 2.43 (0.98-6.02) |              | 87           | 1.92 (0.65-5.68) |              |
| GPRC5A staining                         | 100        |                  |              | 94           |                  |              |
| Low                                     | 64         | 1 (reference)    | <b>0.012</b> | 62           | 1 (reference)    | <b>0.043</b> |
| High                                    | 36         | 1.72 (1.13-2.63) |              | 32           | 1.59 (1.01-2.49) |              |

**Appendix Table S7.** Correlation of ORR and treatment sensitivity with maximum intensity of GPRC5A staining. P values were derived from Pearson Chi-square test.

| <b>PRIMARY</b>               |                | <b>GPRC5A staining</b> |         |      |         |       |         |              |
|------------------------------|----------------|------------------------|---------|------|---------|-------|---------|--------------|
|                              |                | Low                    |         | High |         | Total |         | P value      |
| <b>ORR</b>                   | Responsive     | 61                     | (89.7%) | 25   | (73.5%) | 86    | (84.3%) | <b>0.034</b> |
|                              | Non-responsive | 7                      | (10.3%) | 9    | (26.5%) | 16    | (15.7%) |              |
| Total                        |                | 68                     | (100%)  | 34   | (100%)  | 102   | (100%)  |              |
|                              |                |                        |         |      |         |       |         |              |
|                              |                | Low                    |         | High |         | Total |         | P value      |
| <b>Treatment sensitivity</b> | Sensitive      | 60                     | (90.9%) | 25   | (71.4%) | 85    | (84.2%) | <b>0.011</b> |
|                              | Resistant      | 6                      | (9.1%)  | 10   | (28.6%) | 16    | (15.8%) |              |
| Total                        |                | 66                     | (100%)  | 35   | (100%)  | 101   | (100%)  |              |
|                              |                |                        |         |      |         |       |         |              |
| <b>METASTATIC</b>            |                | <b>GPRC5A staining</b> |         |      |         |       |         |              |
|                              |                | Low                    |         | High |         | Total |         | P value      |
| <b>ORR</b>                   | Responsive     | 56                     | (84.8%) | 30   | (83.3%) | 86    | (84.3%) | 0.841        |
|                              | Non-responsive | 10                     | (15.2%) | 6    | (16.7%) | 16    | (15.7%) |              |
| Total                        |                | 66                     | (100%)  | 36   | (100%)  | 102   | (100%)  |              |
|                              |                |                        |         |      |         |       |         |              |
|                              |                | Low                    |         | High |         | Total |         | P value      |
| <b>Treatment sensitivity</b> | Sensitive      | 55                     | (85.9%) | 31   | (81.6%) | 86    | (84.3%) | 0.558        |
|                              | Resistant      | 9                      | (14.1%) | 7    | (18.4%) | 16    | (15.7%) |              |
| Total                        |                | 64                     | (100%)  | 38   | (100%)  | 102   | (100%)  |              |
|                              |                |                        |         |      |         |       |         |              |

**Appendix Table S8.** Probe IDs from The Cancer Cell Line Encyclopedia (<https://portals.broadinstitute.org/ccle>) for the data used in this study.

| <b>Description</b>        | <b>Probe ID</b> |              |             |             |             |
|---------------------------|-----------------|--------------|-------------|-------------|-------------|
| <b>CDH1</b>               | 201130_s_at     | 201131_s_at  |             |             |             |
| <b>CDH2</b>               | 203440_at       | 203441_s_at  |             |             |             |
| <b>VIM</b>                | 1555938_x_at    | 201426_s_at  |             |             |             |
| <b>PAX8</b>               | 121_at          | 207921_x_at  | 207923_x_at | 207924_x_at | 209552_at   |
|                           | 213917_at       | 214528_s_at  | 221990_at   |             |             |
| <b>KRT7</b>               | 1558393_at      | 1558394_s_at | 209016_s_at | 214031_s_at |             |
| <b>CD44</b>               | 1557905_s_at    | 1565868_at   | 204489_s_at | 204490_s_at | 209835_x_at |
|                           | 210916_s_at     | 212014_x_at  | 212063_at   | 216056_at   | 217523_at   |
|                           | 229221_at       | 234411_x_at  | 234418_x_at |             |             |
| <b>EPHA2</b>              | 203499_at       |              |             |             |             |
| <b>EFNA1</b>              | 202023_at       |              |             |             |             |
| <b>RSK1<br/>(RPS6KA1)</b> | 203379_at       |              |             |             |             |
| <b>RSK2<br/>(RPS6KA3)</b> | 203843_at       | 226335_at    |             |             |             |
| <b>RSK3<br/>(RPS6KA2)</b> | 1557970_s_at    | 204906_at    | 212912_at   |             |             |
| <b>RSK4<br/>(RPS6KA4)</b> | 204632_at       | 230544_at    |             |             |             |

**Appendix Table S9.** siRNA sequences

| <b>siRNA</b> | <b>Target sequence</b>       |
|--------------|------------------------------|
| GPRC5A#2     | 5'-GAGGCTAAAGATCACCCCTAAA-3' |
| GPRC5A#5     | 5'-CAACTCAAGTTTAGACCCTTA-3'  |

**Appendix Table S10.** Exact significant p-values in figures.

| <b>Figure</b> | <b>Comparison</b>                              | <b>p-value</b> | <b>Statistical test</b>  |
|---------------|------------------------------------------------|----------------|--------------------------|
| Fig 1C        | OCKI_p01 cis/mock                              | 0.006          | Two-sided Student t-test |
| Fig 1C        | OCKI_p03 cis/mock                              | 0.008          | Two-sided Student t-test |
| Fig 1C        | OCKI_p06 cis/mock                              | 0.007          | Two-sided Student t-test |
| Fig 2B        | OVCAR3 pS897/pY588<br>(0-5 $\mu$ M cis)        | 0.047          | Two-sided Student t-test |
| Fig 2B        | OVCAR3 pS897/pY588<br>(0-10 $\mu$ M cis)       | 0.048          | Two-sided Student t-test |
| Fig 2B        | OVCAR4 pS897/pY588<br>(0-5 $\mu$ M cis)        | 0.012          | Two-sided Student t-test |
| Fig 2B        | OVCAR4 pS897/pY588<br>(0-10 $\mu$ M cis)       | 0.033          | Two-sided Student t-test |
| Fig 2B        | OVCAR4 pS897/pY588<br>(0-20 $\mu$ M cis)       | 0.016          | Two-sided Student t-test |
| Fig 2B        | OVCAR8 pS897/pY588<br>(0-5 $\mu$ M cis)        | 0.019          | Two-sided Student t-test |
| Fig 2B        | OVCAR8 pS897/pY588<br>(0-10 $\mu$ M cis)       | 0.012          | Two-sided Student t-test |
| Fig 2B        | OVCAR8 pS897/pY588<br>(0-20 $\mu$ M cis)       | 0.014          | Two-sided Student t-test |
| Fig 2B        | OVCAR3-OVCAR8<br>pS897/pY588 (0 $\mu$ M cis)   | 0.023          | Two-sided Student t-test |
| Fig 2B        | OVCAR4-OVCAR8<br>pS897/pY588 (0 $\mu$ M cis)   | 0.011          | Two-sided Student t-test |
| Fig 2D        | OVCAR8-OVCAR3 viability<br>(20 $\mu$ M cis)    | <0.0001        | Two-sided Student t-test |
| Fig 2D        | OVCAR8-OVCAR4 viability<br>(20 $\mu$ M cis)    | 0.0006         | Two-sided Student t-test |
| Fig 2E        | HGSC pS897/pY588<br>(0-5 $\mu$ M cis)          | 0.004          | Two-sided Student t-test |
| Fig 2E        | HGSC pS897/pY588<br>(0-10 $\mu$ M cis)         | 0.011          | Two-sided Student t-test |
| Fig 2E        | HGSC pS897/pY588<br>(0-20 $\mu$ M cis)         | 0.02           | Two-sided Student t-test |
| Fig 2H        | OVCAR4 pS897/pY588<br>(0-80 $\mu$ M carbo)     | 0.014          | Two-sided Student t-test |
| Fig 2H        | OVCAR4-OVCAR8<br>pS897/pY588 (0 $\mu$ M carbo) | 0.048          | Two-sided Student t-test |
| Fig 3B        | Mock – carboplatin tumor size<br>(day 43)      | 0.016          | Mann-Whitney U test      |
| Fig 3B        | Mock – carboplatin tumor size<br>(day 47)      | 0.008          | Mann-Whitney U test      |
| Fig 3B        | Mock – carboplatin tumor size<br>(day 50)      | 0.009          | Mann-Whitney U test      |
| Fig 3B        | Mock – carboplatin tumor size<br>(day 53)      | 0.008          | Mann-Whitney U test      |
| Fig 3C        | Mock – carboplatin ascites<br>volume (day 53)  | 0.006          | Mann-Whitney U test      |

|        |                                                       |         |                          |
|--------|-------------------------------------------------------|---------|--------------------------|
| Fig 3F | Mock – carboplatin EphA2                              | 0.007   | Mann-Whitney U test      |
| Fig 3G | Mock – carboplatin<br>EphA2_pS897                     | 0.009   | Mann-Whitney U test      |
| Fig 3I | Mock – carboplatin clCasp3                            | 0.012   | Mann-Whitney U test      |
| Fig 4B | TYK-nu pS897/pY588<br>(0-5 $\mu$ M cis)               | 0.004   | Two-sided Student t-test |
| Fig 4B | TYK-nu pS897/pY588<br>(0-10 $\mu$ M cis)              | 0.009   | Two-sided Student t-test |
| Fig 4B | TYK-nu.R pS897/pY588<br>(0-5 $\mu$ M cis)             | 0.033   | Two-sided Student t-test |
| Fig 4B | TYK-nu.R pS897/pY588<br>(0-10 $\mu$ M cis)            | 0.014   | Two-sided Student t-test |
| Fig 4B | TYK-nu - TYK-nu.R<br>pS897/pY588 (0 $\mu$ M cis)      | 0.004   | Two-sided Student t-test |
| Fig 4F | TYK-nu pS897/GAPDH<br>(mock-BI-1870)                  | 0.003   | Two-sided Student t-test |
| Fig 5A | OVCAR4 viability mock-<br>BI-D1870 (5 $\mu$ M cis)    | <0.0001 | Two-sided Student t-test |
| Fig 5A | OVCAR4 viability mock-<br>BI-D1870 (10 $\mu$ M cis)   | 0.001   | Two-sided Student t-test |
| Fig 5A | OVCAR8 viability mock-<br>BI-D1870 (20 $\mu$ M cis)   | 0.001   | Two-sided Student t-test |
| Fig 5A | TYK-nu viability mock-<br>BI-D1870 (0 $\mu$ M cis)    | 0.025   | Two-sided Student t-test |
| Fig 5A | TYK-nu.R viability mock-<br>BI-D1870 (0 $\mu$ M cis)  | 0.002   | Two-sided Student t-test |
| Fig 5A | TYK-nu.R viability mock-<br>BI-D1870 (5 $\mu$ M cis)  | <0.0001 | Two-sided Student t-test |
| Fig 5A | TYK-nu.R viability mock-<br>BI-D1870 (10 $\mu$ M cis) | 0.004   | Two-sided Student t-test |
| Fig 5B | OVCAR8 viability mock-LJH685<br>(10 $\mu$ M cis)      | 0.041   | Two-sided Student t-test |
| Fig 5B | OVCAR8 viability mock-LJH685<br>(20 $\mu$ M cis)      | 0.011   | Two-sided Student t-test |
| Fig 6B | OVCAR8 GPRC5A 46/41 kDa<br>(cis)                      | 0.011   | Two-sided Student t-test |
| Fig 6B | OVCAR8 GPRC5A 46/41 kDa<br>(LJH685)                   | 0.025   | Two-sided Student t-test |
| Fig 6B | TYK-nu.R GPRC5A 46/41 kDa<br>(cis)                    | 0.011   | Two-sided Student t-test |
| Fig 6B | TYK-nu.R GPRC5A 46/41 kDa<br>(LJH685)                 | 0.004   | Two-sided Student t-test |
| Fig 6F | TYK-nu.R viability siNT-siRSK1                        | 0.016   | Two-sided Student t-test |
| Fig 6F | TYK-nu.R viability siNT-siRSK2                        | 0.006   | Two-sided Student t-test |
| Fig 6F | TYK-nu.R viability siNT-<br>siRSK1+2                  | 0.007   | Two-sided Student t-test |
| Fig 7B | clCasp3+ OVCAR8 (mock-cis)                            | 0.029   | Two-sided Student t-test |
| Fig 7B | clCasp3+ OVCAR8<br>(mock-combinatorial)               | 0.002   | Two-sided Student t-test |



|          |                                                                       |                 |                          |
|----------|-----------------------------------------------------------------------|-----------------|--------------------------|
| Fig 7B   | clCasp3+ co-culture (mock-combinatorial)                              | 0.022           | Two-sided Student t-test |
| Fig 7D   | clCasp3+ co-culture (mock-cis)                                        | 0.023           | Two-sided Student t-test |
| Fig 7D   | clCasp3+ co-culture (cis-combinatorial)                               | 0.002           | Two-sided Student t-test |
| Fig 7D   | clCasp3+ co-culture (mock-combinatorial)                              | 0.003           | Two-sided Student t-test |
| Fig 7F   | Mock – carboplatin+BI-1870 TUNEL+                                     | 0.0143          | Mann-Whitney U test      |
| Fig 8E   | OCKI_p02 viability mock-BI-D1870 (10 $\mu$ M cis)                     | 0.027           | Two-sided Student t-test |
| Fig 8E   | OCKI_p02 viability mock-BI-D1870 (20 $\mu$ M cis)                     | 0.02            | Two-sided Student t-test |
| Fig 8E   | OCKI_p06 viability mock-BI-D1870 (20 $\mu$ M cis)                     | 0.012           | Two-sided Student t-test |
| Fig EV1E | clCasp3+ OCKI_p13 (mock-cis)                                          | 0.022           | Two-sided Student t-test |
| Fig EV3C | OVCAR4 viability mock-RSK1/2 (5 $\mu$ M cis)                          | 0.003 / 0.048   | Two-sided Student t-test |
| Fig EV3C | OVCAR4 viability mock-RSK1 (10 $\mu$ M cis)                           | 0.0005          | Two-sided Student t-test |
| Fig EV3D | OVCAR8 viability mock-RSK1 (20 $\mu$ M cis)                           | 0.049           | Two-sided Student t-test |
| Fig EV3E | OVCAR4 viability mock-GPRC5A (2.5 $\mu$ M cis)                        | 0.022           | Two-sided Student t-test |
| Fig EV3E | OVCAR4 viability mock-GPRC5A (10 $\mu$ M cis)                         | 0.002           | Two-sided Student t-test |
| Fig EV3F | OVCAR4 viability mock-EphA2 (5 $\mu$ M cis)                           | 0.029           | Two-sided Student t-test |
| Fig EV4B | GPRC5A-EphA2 co-localization (mock-carbo)                             | 0.0002          | Mann-Whitney U test      |
| Fig S2C  | OCKI_p06 Tp53 intensity (nutlin/mock)                                 | 0.011           | Two-sided Student t-test |
| Fig S2C  | ANR8 Tp53 intensity (nutlin/mock)                                     | 0.01            | Two-sided Student t-test |
| Fig S3B  | OVCAR8 viability 0-100 $\mu$ M LJH685                                 | 0.039           | Two-sided Student t-test |
| Fig S3B  | TYK-nu viability 0-100 $\mu$ M LJH685                                 | 0.012           | Two-sided Student t-test |
| Fig S3E  | OVCAR4 viability mock-Tram. 0.5 $\mu$ M / 1 $\mu$ M (0 $\mu$ M cis)   | Both <0.0001    | Two-sided Student t-test |
| Fig S3E  | OVCAR4 viability mock-Tram. 0.5 $\mu$ M / 1 $\mu$ M (2.5 $\mu$ M cis) | Both <0.0001    | Two-sided Student t-test |
| Fig S3E  | OVCAR4 viability mock-Tram. 0.5 $\mu$ M / 1 $\mu$ M (5 $\mu$ M cis)   | 0.0003 / 0.0004 | Two-sided Student t-test |
| Fig S3H  | TUNEL+ tumor (mock-carbo)                                             | 0.049           | Mann-Whitney U test      |
| Fig S3H  | TUNEL+ tumor (mock-combinatorial)                                     | 0.021           | Mann-Whitney U test      |
