# Supplementary material for: Adaptive RSK‐EphA2‐GPRC5A signaling switch triggers chemotherapy resistance in ovarian cancer
Source: PubMed Central journal article supplement (PMC7136956; doi:10.15252/emmm.201911177), 2020-03-02
Supplement: EMMM-12-e11177-s002.pdf [file EMMM-12-e11177-s002.pdf]

## Expanded View Figures

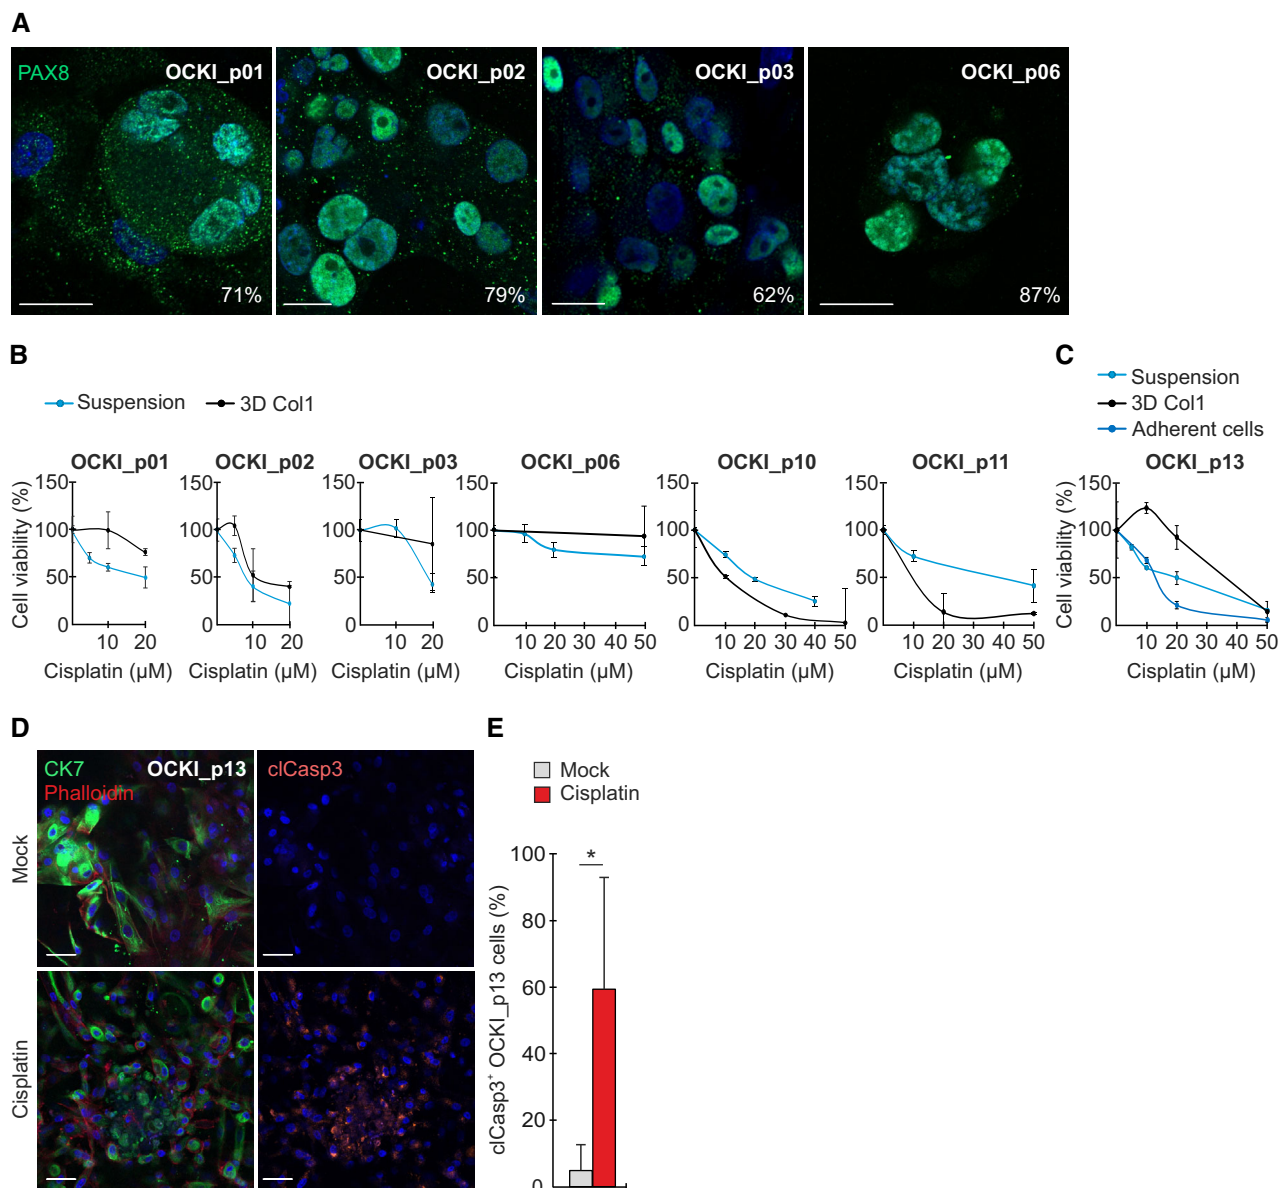

**Figure EV1. Patient-derived HGSC cells show variable cisplatin resistance in 3D collagen.**

**A** Confocal micrographs show PAX8 (green) in primary patient-derived HGSC cells after 7-days culture in 3D collagen. Cells were 62–87% positive for the nuclear HGSC marker. Scale bars: 20  $\mu$ m.

**B, C** Viability of patient-derived HGSC cells cultured for 7 days in ascites-like suspension or 3D collagen (**B, C**; viability of freshly isolated primary cells could only be assessed once with  $N = 3$  experimental replicates) as well as in an adherent culture (**C**;  $N = 3$ ) after 0–50  $\mu$ M cisplatin treatment for 72 h. Cells derived from patient OCKI\_p01, OCKI\_p03, OCKI\_p06, and OCKI\_p13 showed treatment resistance particularly when embedded in 3D collagen.

**D, E** Representative confocal micrographs show cytokeratin 7 (CK7, green), phalloidin (F-actin, red), and cleaved caspase-3 (cIcasp3, orange) in 3D OCKI\_p13 HGSC culture treated without or with 20  $\mu$ M cisplatin for 72 h, 4 days after 3D embedding. Corresponding quantification for cIcasp3 (**E**). Scale bars: 50  $\mu$ m.  $N = 4$ .

Data information: In (**B, C** and **E**), data are presented as mean (SD). \* $P < 0.05$ . Exact  $P$ -values are provided in Appendix Table S10, Student's  $t$ -test.

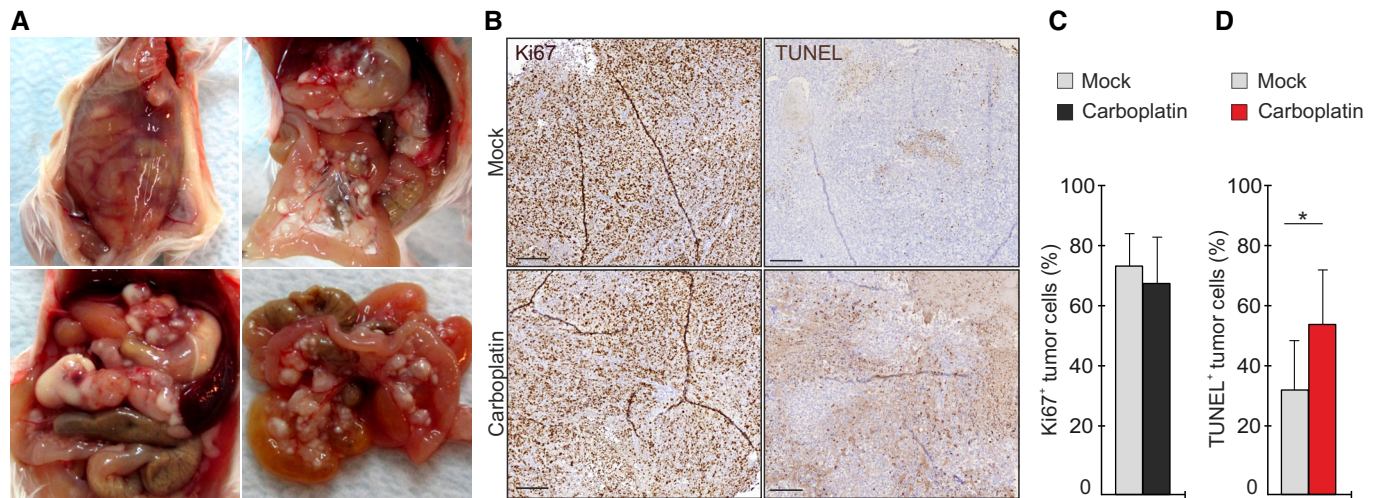

**Figure EV2. OVCAR xenograft tumor model mimics human HGSC.**

**A** Representative images of tumors in OVCAR4 xenograft mice, mimicking the development of HGSC in patients: accumulation of ascites in the peritoneal cavity, widely disseminated metastatic foci, and multiple nodules located in the omentum and peritoneal membrane.

**B–D** Histological assessment of proliferation by Ki67 and apoptosis by TUNEL (**B**) and corresponding quantification of Ki67<sup>+</sup> (**C**) and TUNEL<sup>+</sup> (**D**) OVCAR4 in xenograft tumors of mock and carboplatin-treated mice.  $N = 5$  mice/group. Scale: 200  $\mu\text{m}$ . Carboplatin treatment significantly induced apoptosis but had no major effect on proliferation.

Data information: In (**C**, **D**), data are presented as mean (SD). \* $P < 0.05$ . Exact  $P$ -values are provided in Appendix Table S10, Mann–Whitney  $U$ -test.

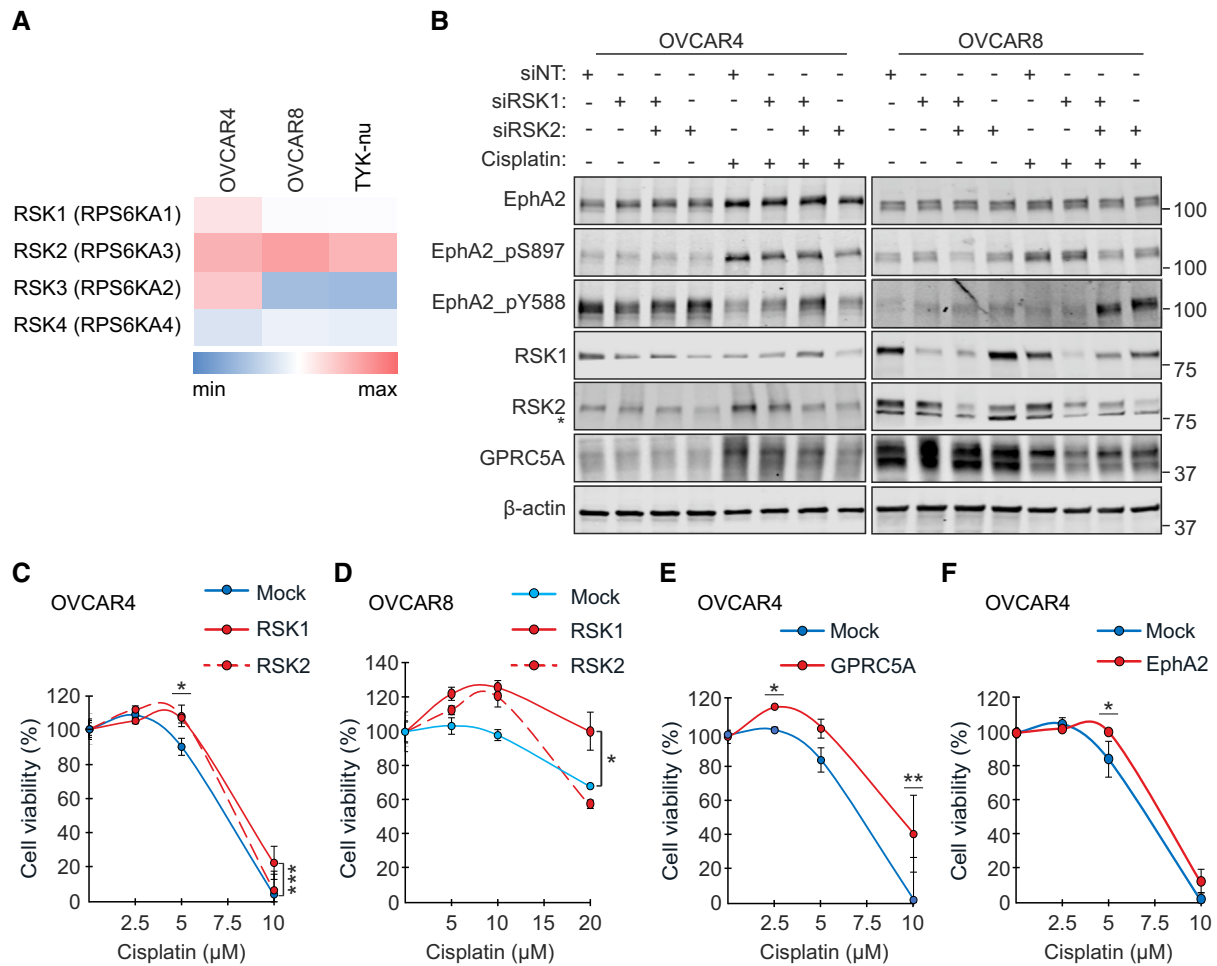

**Figure EV3. RSK1/2 specifically regulates EphA2-GPRC5A signaling axis.**

**A** Heat map for RSK1 (RPS6KA1), RSK2 (RPS6KA3), RSK3 (RPS6KA2), and RSK4 (RPS6KA4) mRNAs in OVCAR4, OVCAR8, and TYK-nu. The cells expressed most prominently RSK1/2 over RSK3/RSK4. Data obtained from the Cancer Cell Line Encyclopedia (<https://portals.broadinstitute.org/ccle>) and illustrated per cell line. See Appendix Table S8 for probe IDs.

**B** EphA2, RSK1, and RSK2 protein levels and EphA2 phosphorylation as indicated in RSK1/2-depleted and cisplatin-treated OC cells 5 days after transfection. OVCAR4 was treated with 0–5  $\mu$ M and OVCAR8 with 0–10  $\mu$ M cisplatin for 72 h. Asterisk indicates unspecific band.

**C, D** Cell viability of RSK1 and RSK2 overexpressing OVCAR4 (**C**;  $N = 4$ ) and OVCAR8 (**D**;  $N = 3$ ) after treatment with 0–20  $\mu$ M cisplatin for 72 h.

**E, F** Viability of OVCAR4 overexpressing GPRC5A (**E**;  $N = 4$ ) or EphA2 (**F**;  $N = 3$ ) after treatment with 0–10  $\mu$ M cisplatin for 72 h.

Data information: In (**C–F**), data are presented as mean (SD). \* $P < 0.05$ , \*\* $P < 0.01$ , \*\*\* $P < 0.001$ . Exact  $P$ -values are provided in Appendix Table S10, Student's  $t$ -test.

Source data are available online for this figure.

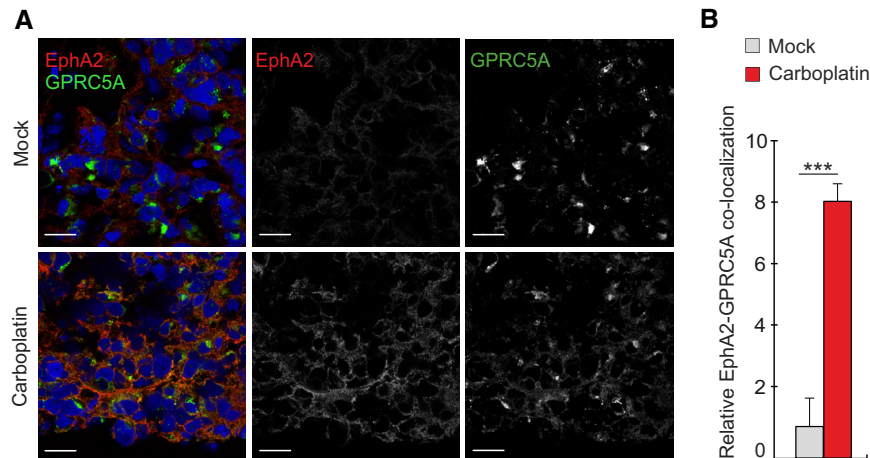

**Figure EV4. Co-localization of GPRC5A and EphA2 is induced upon platinum treatment *in vivo*.**

A, B Representative confocal micrographs (A) of EphA2 (red) and GPRC5A (green) and corresponding co-localization quantification (B) in OVCA4 xenograft tumors of mock and carboplatin-treated mice.  $N = 5$  mice/group. Scale bars: 20  $\mu\text{m}$ .

Data information: In (B), data are presented as mean (SD). \*\*\* $P < 0.001$ . Exact  $P$ -values are provided in Appendix Table S10, Mann-Whitney  $U$ -test.

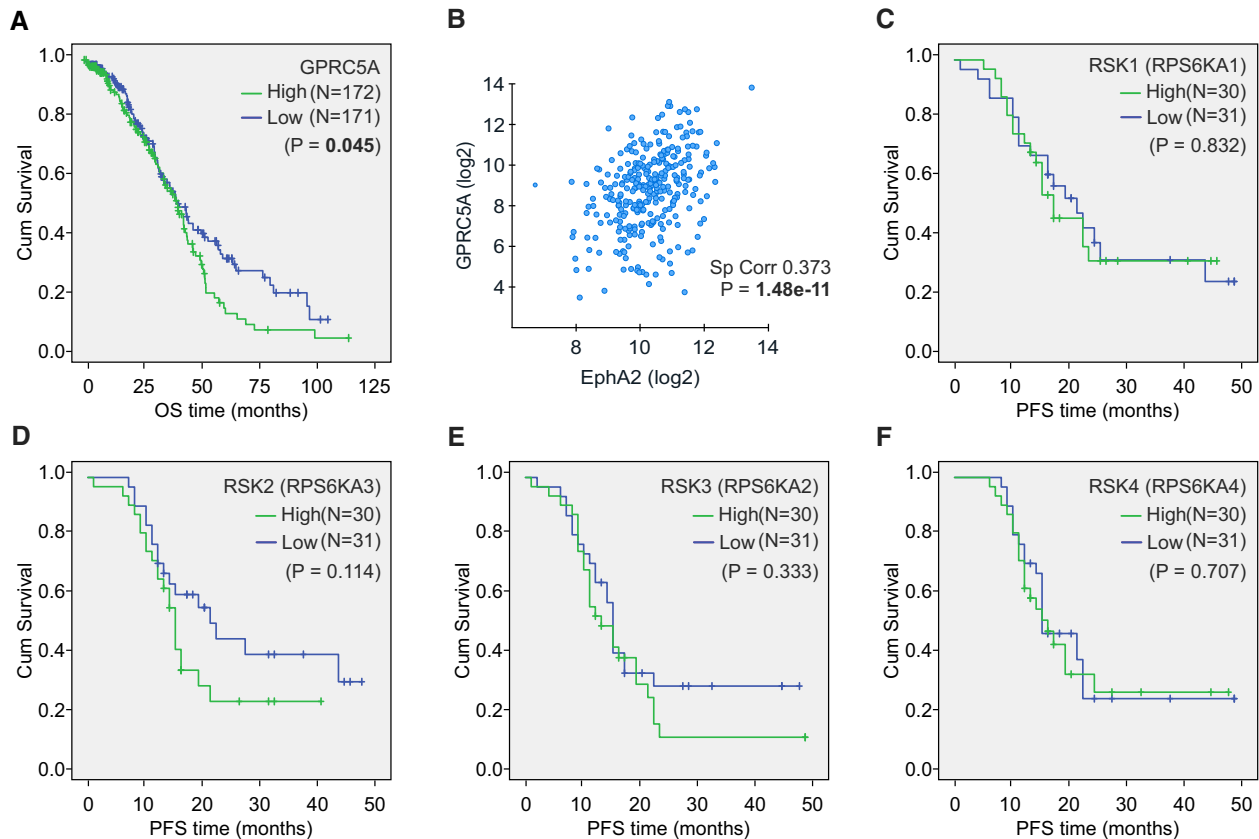

**Figure EV5. GPRC5A is co-expressed with EphA2 and associates with worse survival of OC patients.**

A Kaplan-Meier survival curve illustrates the overall survival (OS) of patients with high or low (top 40% vs. bottom 40%) GPRC5A mRNA expression. Mean OS was 46 months for GPRC5A<sup>high</sup> vs. 56 months for GPRC5A<sup>low</sup>.

B Scatter plot illustrates the correlation of EphA2 and GPRC5A mRNA in OC (using TCGA by cBioPortal for Cancer Genomics).

C-F Kaplan-Meier survival curves illustrate the progression-free survival (PFS) of patients with high or low (top 25% vs. bottom 25%) RSK1 (RPS6KA1; C), RSK2 (RPS6KA3; D), RSK3 (RPS6KA2; E), and RSK4 (RPS6KA4; F) mRNA expression. No significant differences in PFS were observed in these survival analyses.

Data information: In (A, C-F), logrank test was used. In (B), Spearman's rank test was used.
