# Supplementary material for: Adaptive RSK‐EphA2‐GPRC5A signaling switch triggers chemotherapy resistance in ovarian cancer
Source: PubMed Central journal article supplement (PMC7136956; doi:10.15252/emmm.201911177), 2020-03-02
Supplement: EMMM-12-e11177-s004.pdf [file EMMM-12-e11177-s004.pdf]

1 2 3 4 5 6 7 8

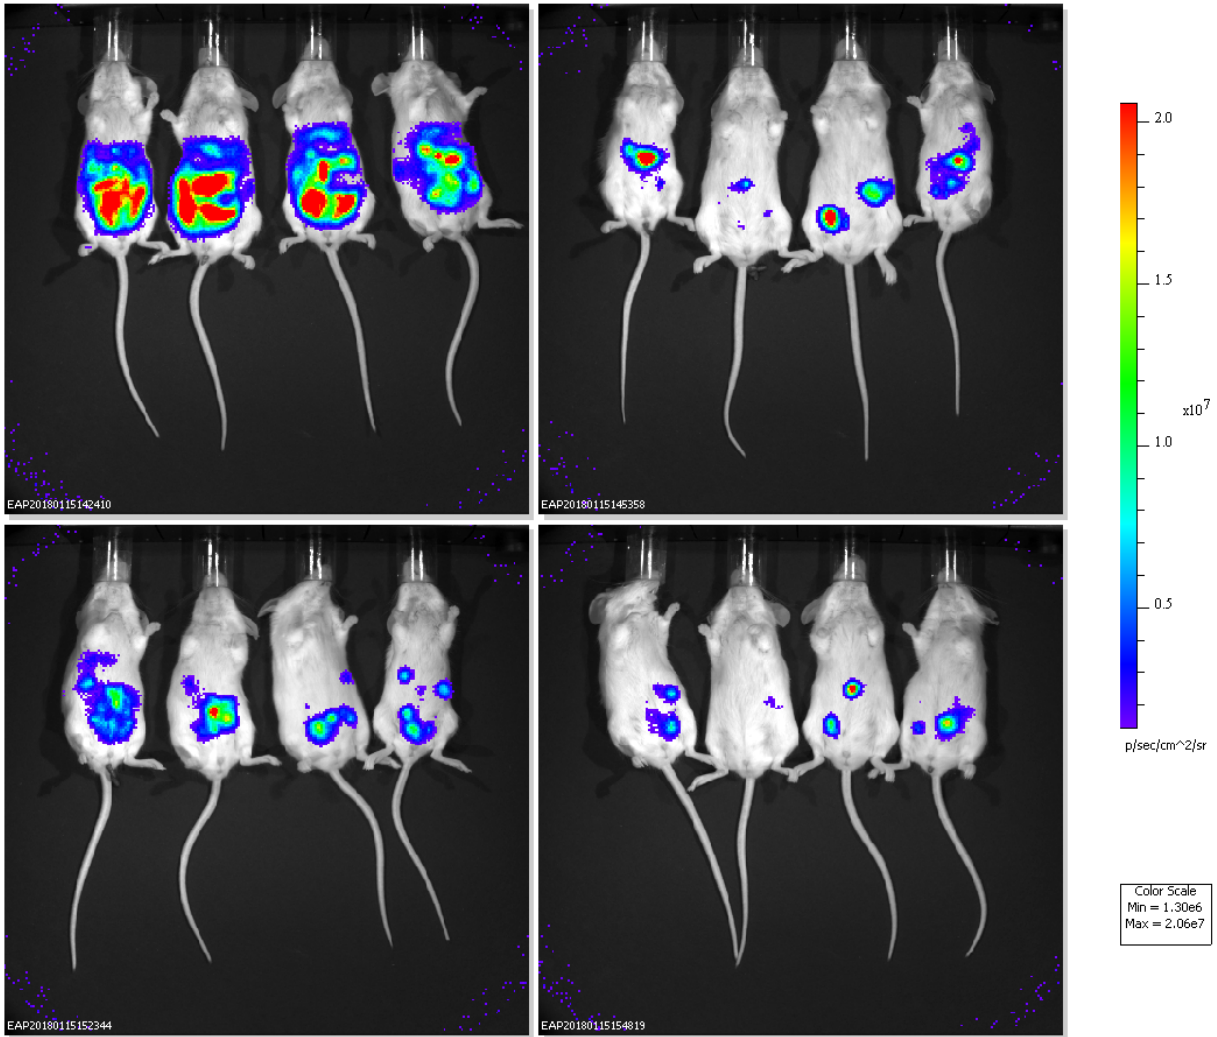

10 20 30 40

50 60 70 80

Control: 1, 2, 3, 4, 10

Carboplatin: 6, 30, 50, 70, 80

Carboplatin+BI-D1870 (not included in manuscript due to liver toxicity, forcing us to quit the dosing): 5, 7, 8, 20, 40, 60
