# Supplementary material for: Adaptive RSK‐EphA2‐GPRC5A signaling switch triggers chemotherapy resistance in ovarian cancer
Source: PubMed Central journal article supplement (PMC7136956; doi:10.15252/emmm.201911177), 2020-03-02

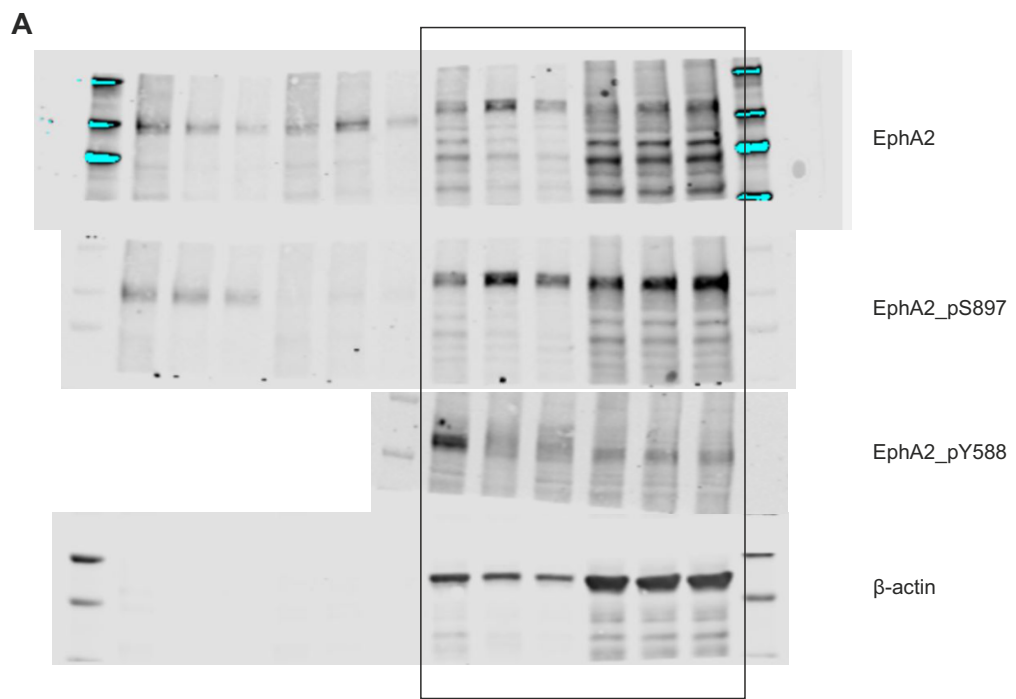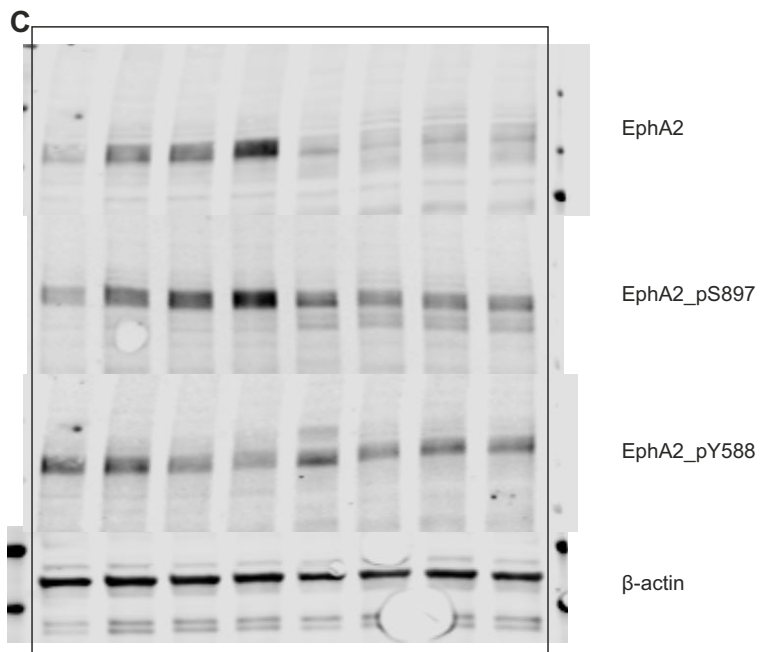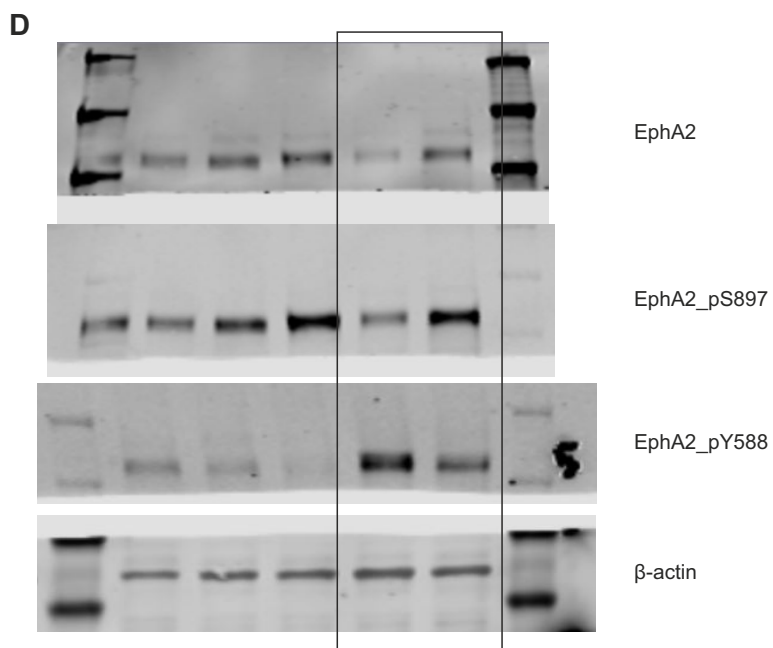

**E**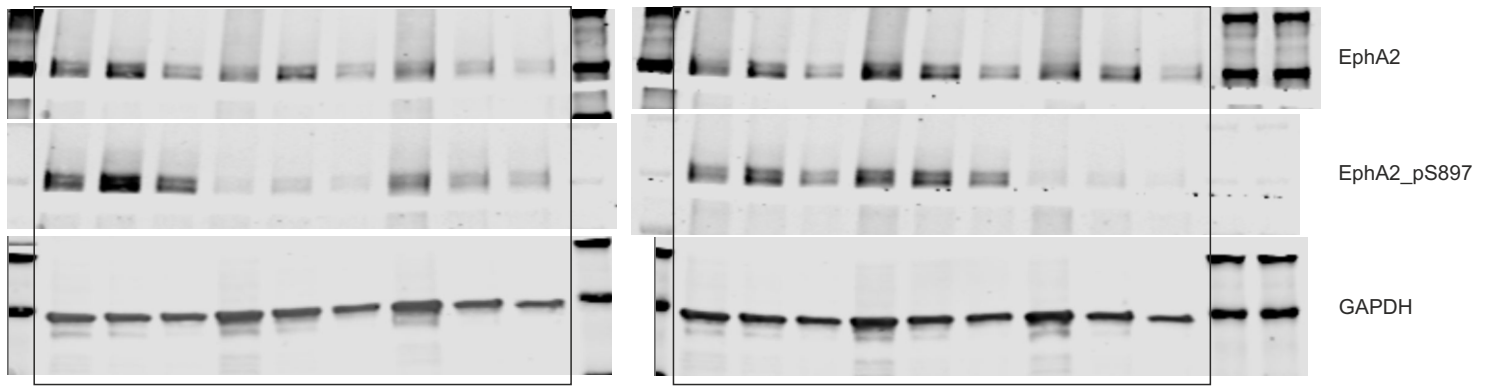**G**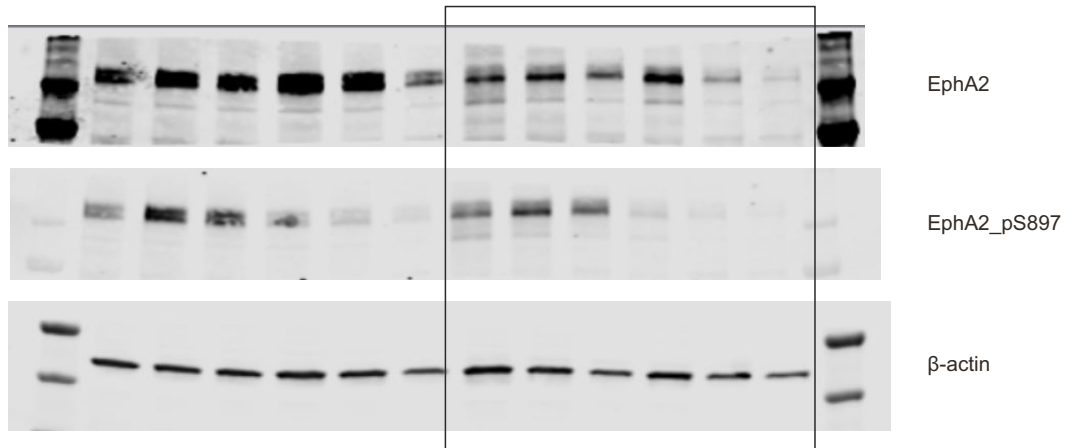**H-I**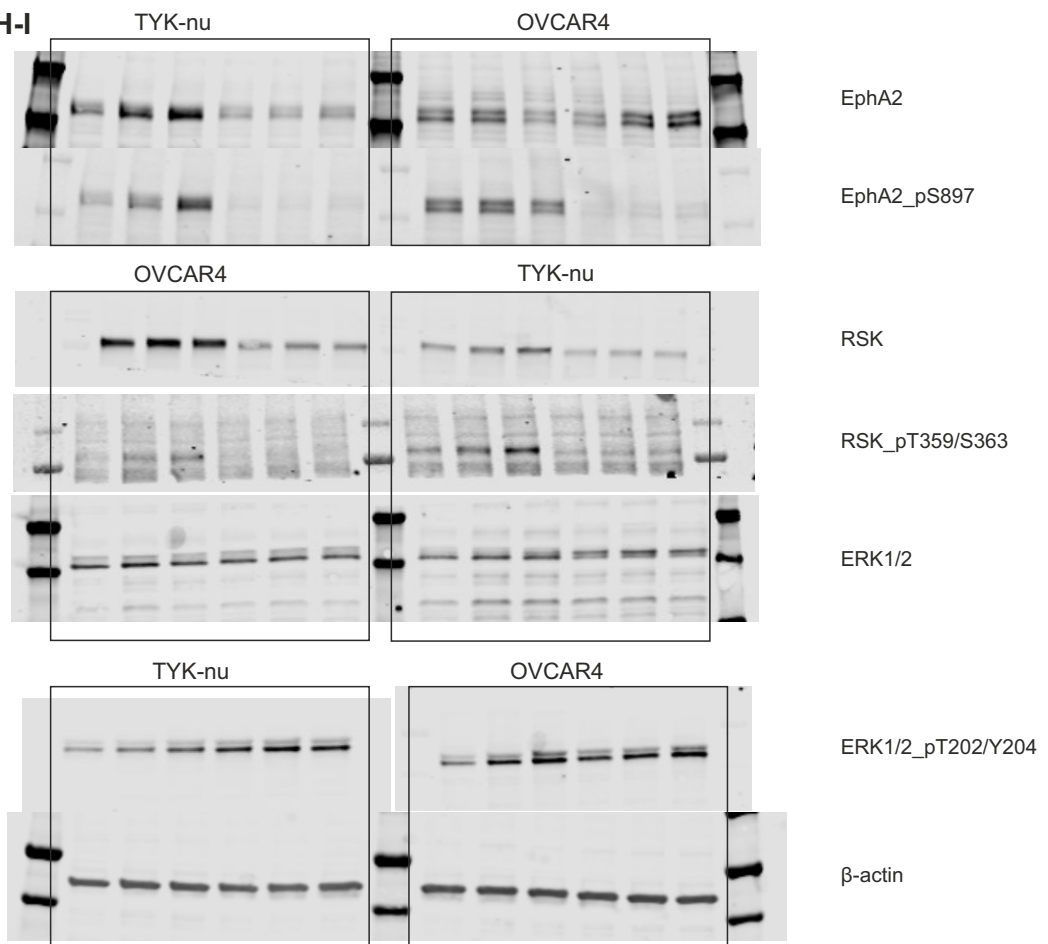

Supplement: EMMM-12-e11177-s005.pdf [file EMMM-12-e11177-s005.pdf]
